# Supplementary material
Source: PubMed Central journal article supplement (PMC4922167)
Supplement: pnas.1513616113.sapp.pdf [file pnas.1513616113.sapp.pdf]

## SUPPLEMENTAL MATERIALS.

### 1. Supplemental Figures and Tables.

**Figure S1.** **A.** Genes assessed for differential expression in 344SQ versus 393P cell lines; graphs show quantification of qRT-CPR data. **B.** Western blot of MSI2 protein expression in 7 non-invasive versus 7 metastatic murine cell lines. **C.** Quantification of MSI1 mRNA and protein data in 7 non-invasive versus 7 metastatic murine cell lines. **D.** Western blot of Msi1 protein expression in 7 non-invasive versus 7 metastatic murine cell lines. **E.** Representative AQUA images of MSI2 expression from analysis of TMAs containing 22 normal and 123 NSCLC specimens. Blue - DAPI; Green -cytokeratin; Red - MSI2. Scale bars: 100  $\mu$ m. **F.** Quantification of MSI1 expression in TMA of 19 normal and 120 NSCLC specimens was not significant, as determined by Mann-Whitney test. **G.** KM Plots (<http://kmplot.com/>) analysis of overall survival in non-small cell lung cancer expressing high versus low MSI2. **H.** Western confirmation of higher expression of MSI2 human NSCLC A549 and H358 cell lines versus H226 and H322. **I.** qRT-PCR indicates effective stable knockdown of MSI2 in 344SQ, 531LN2 murine and MSI2 in A549, H358 human cell lines by independent shRNA depleting MSI2 (-m1, -m2, -h1, -h2) or a control shRNA (SCR). **J.** Representative images of crystal violet-stained cells from Matrigel invasion assay for the 531LN2, A549, and H358 cell lines. **K.** Western blot of MSI2 expression following transfection of siRNAs targeting Msi2 in 344SQ murine and A549 and H358 human NSCLC cell lines, using 2 independent siRNAs. **L.** Quantification of Matrigel invasion assay for 344SQ and A549 cells, transfected by GL2 control or Msi2/MSI2 –targeting SiRNAs, based on three independent assays. **M., N.** Quantification of viability assay calculated by CellTiterBlue (CTB) (**M**) or direct count of DAPI-stained nuclei (**N**). P values reflect data on final day of experiment. All graphs: \*,  $p \leq 0.05$ ; \*\*,  $p \leq 0.01$ ; \*\*\*,  $p \leq 0.001$  relative to controls.

**Figure S2.** **MSI2 depletion decreases response of murine 344SQ and human H358 cells to TGF-beta stimulation of ECM matrix sphere formation.** Images (**A**) and quantitation (**B**) of control (SCR) and MSI2-depleted (-m1, -m2) 344SQ cells grown on ECM Matrix for 5 days in the presence of 0, 10, or 100 ng/ml TGF $\beta$ . All cells were imaged by confocal microscopy. Scale bar, 50  $\mu$ m. All graphs: \*,  $p \leq 0.05$ ; \*\*,  $p \leq 0.01$ ; \*\*\*,  $p \leq 0.001$  relative to indicated controls.

**Figure S3.** **Primary and metastatic 344SQ Tumor Growth in Subcutaneous Xenografts.** **A.** Gross tumor volume measurement of subcutaneous (S.C.) tumor growth of control (SCR) and MSI2-depleted (-m1, -m2) 344SQ xenografts. **B., C.** IHC assessment for (**B**) Ki-67 proliferation marker and (**C**) cleaved caspase apoptotic marker in 344SQ primary subcutaneous xenograft tumors using H-score, quantified by Vectra. **D.** Left, graph represents metastatic burden in lung of the mice with 344SQ subcutaneous xenografts analyzed in (**A**), expressed as ratio of metastatic area / total lung, quantified from three section levels per lung. Right, representative images of metastatic burden of SCID mice with 344SQ control (SCR) and MSI2 depleted (-m1/-m2) subcutaneous xenografts. Arrows indicate metastatic nodules in the lungs. **E, F.** Analysis of the same metastases shown in (**D**) for expression of Ki-67 (**E**) and cleaved caspase (**F**); H-score quantitation performed as in (**B, C**) Scale bars: shown on images respectively. All graphs: values shown are not significant between comparison groups, except \*\*\*\*,  $p \leq 0.0001$  for **D**.

**Figure S4.** **MSI2 overexpression, and MSI2 phenotype in migration control.** **A.** Quantification of CellTiterBlue (CTB) proliferation assays of 393p/M2a and 393p/M2b MSI2-overexpressing clones versus 393p/cDNA control cell lines. **B., C.** Quantification (**B**) and representative image (**C**) of Matrigel invasion analysis of 393p/cDNA control and 393p/M2a and 393p/M2b MSI2 overexpressing cell lines. **D.** Gross pathological assessment of lung metastases of 393p xenografts (393p/cDNA, 393p/M2a and 393p/M2b). **E.** Quantification of cell migration for indicated cell lines with control (SCR) or MSI2-targeting shRNAs, based on a wound healing assay. **F.** Quantified migration for the SCR control and MSI2-depleted cells 531LN2 cell line in a transwell invasion assay. Statistical differences were calculated for each time point using Excel software, t-test. All graphs: \*,  $p \leq 0.05$ ; \*\*,  $p \leq 0.01$ ; \*\*\*,  $p \leq 0.001$  relative to controls.

**Figure S5. Reverse phase protein array (RPPA) analysis heatmap representing relative expression of 171 proteins or phosphoproteins.** Comparison groups are two independent 344SQ derivatives with MSI2 knockdown (-m1 and -m2) and negative control. Three biological repeats were used for each cell line. 344SQ-SCR, 344SQ-m1 344SQ-m2 murine cells were lysed and prepared according to MD Anderson Core Facility instructions as previously described, and RPPA performed at the facility (48-50). Data were analyzed to establish significant differences in expression using the MultiExperiment Viewer (MeV, v4.9) program ([www.tm4.org/mev/](http://www.tm4.org/mev/)) (51). Scale bar represents ln values from fold change. Note, some hits scoring as positive in this assay were not validated in subsequent probe of MSI2 depletion in the 4 independent cell line models used in this study, including notably NOTCH-1.

**Figure S6. Stable and transient depletion or overexpression of MSI2.** **A.** qRT-PCR comparing expression of mRNA for FN1 and CLDN7 in 4 model NSCLC cell lines (MSI2-depleted -m1/-h1, -m2/-h2) and SCR, control scrambled shRNA. Graphs represent data from four independent runs. **B.** Western blot analysis quantification of CLDN7 protein expression in 4 model NSCLC cell lines (-m1,-m2,-h1,-h2 MSI2-depleted) and SCR, control scrambled shRNA. Graphs represent data from four independent runs. **C.** Western blot analysis of indicated proteins in 344SQ, A549 and H358 cell lines, transfected by GL2 control or MSI2-depleting (-m1, -m2,-h1, -h2) siRNAs. **D.** Western blot analysis of NUMB expression in murine and human cell lines. **E., F.** qRT-PCR (**E**) and Western (**F**) quantification of expression of mRNA for CLDN5 and CLDN3 in 4 NSCLC cell lines expressing control shRNA (SCR) or MSI2-depleting shRNA (-m1,-m2,-h1,-h2). Graphs represent data from four independent experiments. **G.** qRT-PCR comparing expression of TGF $\beta$ R1 and SMAD3 in 4 model NSCLC cell lines expressing control shRNA (SCR) or MSI2-depleting shRNA (-m1,-m2,-h1,-h2). Graphs represent data from four independent experiments. **H.** Western blot of indicated proteins in 3 model cell lines, transfected by GL2 control or two independent MSI2-depleting siRNAs. **I., J.** Western blot analysis of indicated proteins in the 393P cell line, overexpressing MSI2 (393p/M2a and 393p/M2b versus the 393p/cDNA control cell line). All graphs: \*, p $\leq$ 0.05; \*\*, p $\leq$ 0.01; \*\*\*, p $\leq$ 0.001 relative to controls.

**Figure S7. MSI2 controls expression of CLDN7 at cell-cell junctions.** **A., B.** Immunofluorescence analysis of CLDN7 co-stained with the tight junction marker ZO-1 in murine 344SQ (**A**) and 531LN2 (**B**) NSCLC cell lines, with or without MSI2 stable knockdowns. Green, CLDN7; Red, ZO-1; Blue, DAPI. Scale bars are 30 $\mu$ m.

**Figure S8. Western blot analysis of EMT markers in MSI2 overexpressing or depleted cells.** **A., B.** Western blot analysis (**A**) and quantification (**B**) of MSI2, ZEB-1, ZEB-2, FOXC2, SNAIL, SLUG, VMN (vimentin) versus  $\beta$ -actin loading control in 344SQ, A549 and H358 cell lines expressing MSI2 (SCR) or depleted of MSI2 (-m1, -m2, -h1, -h2). **C., D.** Western blot analysis (**C**) and quantification (**D**) of MSI2, E- Cadherin, vimentin, SLUG and SNAIL protein expression 393p/cDNA control and 393p/M2a and 393p/M2b MSI2 overexpressing cell lines. All graphs: \*, p $\leq$ 0.05; \*\*, p $\leq$ 0.01; \*\*\*, p $\leq$ 0.001 relative to controls.

**Figure S9. Invasion by TGF $\beta$ R1/SMAD3-overexpressing NSCLC 3NSCLC cell lines.** **A., B.** Representative Western blot (**A**) and quantitation of TGF $\beta$ R1 (**B**) in 344SQ (left) or A549 (right) cells expressing control (SCR) or MSI2-depleting shRNA (m1, h1), after introduction of TGF $\beta$ R1 (T $\beta$ R1). **C., D.** Quantified (**C**) and representative (**D**) data for invasion through Matrigel for the cell models shown in **A, B. D.** All graphs: \*, p $\leq$ 0.05; \*\*, p $\leq$ 0.01; \*\*\*, p $\leq$ 0.001.

**Figure S10. Quantification of Western blots of control and MSI2-depleted mouse NSCLC cells, transiently depleted of TGF $\beta$ R1 or SMAD3.** **A., B.** Quantified data for Western blots shown in Figure 3A, B. for 344SQ (**A**) and A549 (**B**) cells with (-m1 and -h1) or without (SCR) shRNA depletion of MSI2, and with depletion of TGF $\beta$ R1 (-t $\beta$ 1, -t $\beta$ 2, -T $\beta$ 1 and -T $\beta$ 2), SMAD3 (-sm1, -sm2, -Sm1 and -Sm2) or neither (GL2) by siRNA depletion of TGF $\beta$ R1. All graphs: \*, p $\leq$ 0.05; \*\*, p $\leq$ 0.01; \*\*\*, p $\leq$ 0.001 relative to controls based on t-test.

**Figure S11. CLDN7 regulation of invasion.** **A., B.** Representative Western blot analysis of indicated proteins (**A**) and quantification of CLDN7 expression (**B**) in pCMV6-control/SCR and pCLDN7/SCR stably transfected

A549 cells. **C.**, **D.** Quantification (**C**) and representative images (**D**) of Matrigel invasion for pCMV-control/SCR and pCLDN7/SCR stably transfected A549 cells. **E.**, **F.** Western blot analysis (**E**) and quantification of CLDN7 expression (**F**) in 344SQ cells expressing MSI2 (SCR) or stably MSI2-depleted (-m1) transiently transfected with GL2 control or CLDN7 siRNAs. **G.** Quantification of Matrigel invasion assay for cells in **E**, **F.**, based on three experiments. All graphs: \*,  $p \leq 0.05$ ; \*\*,  $p \leq 0.01$ ; \*\*\*,  $p \leq 0.001$  relative to controls.

**Table S1. Primers used in RT-QPCR analysis.** Expression of genes noted in left column were analyzed by Taqman or SYBR Green assays, using primers indicated in columns 2-4 as noted.

**Table S2. Patient characteristics for the primary NSCLC tumors arrayed in tissue microarray (TMA).**

**Table S3. Patient characteristics for the analyzed grouped NSCLC samples (normal, primary tumor and lymph node metastasis).**

**Table S4. Sequences of siRNA mixtures and shRNA used in gene knockdowns.** Data represent siRNA pools (two independent siRNAs/pool) used for depletion of the genes indicated, for function testing experiments.

**Table S5. Antibodies used for RPPA analysis.** A list of antibodies used with corresponding catalog numbers, validation status (2013), provided by MD Anderson Cancer Center RPPA Facility.

## 2. Supplemental Methods.

**Quantitative RT-PCR analysis.** Total RNA was isolated using a Qiagen AllPrep DNA/RNA Mini Kit (#80204) and tested for quality on a Bioanalyzer (Agilent Technologies, Santa Clara, CA). RNA concentrations were determined with a NanoDrop spectrophotometer (Thermo Fisher Scientific, Waltham, MA). RNA was reverse transcribed using Moloney murine leukemia virus reverse transcriptase (Ambion-Thermo Fisher Scientific, Waltham, MA) and a mixture of anchored oligo-dT and random decamers (Integrated DNA Technologies, Coralville, IA). Two reverse-transcription reactions were performed for each sample using either 100 or 25 ng of input RNA. Aliquots of the cDNA were used to measure the expression levels of the genes using the primers listed in Supplementary Table S1. The assays were from Applied Biosystems (Thermo Fisher Scientific Waltham, MA) or designed with Primer Express as indicated in Table S1. They were used in combination with Taqman Universal Master mix or Power SYBR Green master mix (Applied Biosystems, Thermo Fisher Scientific Waltham, MA) and run on a 7900 HT sequence detection system (Applied Biosystems, Thermo Fisher Scientific Waltham, MA). Cycling conditions were 95°C, 15 min, followed by 40 (two-step) cycles (95°C, 15 s; 60°C, 60 s). Ct (cycle threshold) values were converted to quantities (in arbitrary units) using a standard curve (four points, four fold dilutions) established with a calibrator sample. Ppib and POLR2F were used as normalizers. For each sample, the values were averaged and standard deviation of data derived from two independent PCR experiments.

**siRNA Targeting Sequences:** Small interfering RNAs (siRNAs) were obtained from GE Dharmacon (Lafayette, CO). See Supplementary Table S4 for sequences used.

**shRNA Targeting Sequences and lentivirus production:** Short hairpin RNAs (shRNAs) were obtained from SIGMA-ALDRICH (St Louis, MO). See Supplementary Table S4 for sequences used. To prepare lentivirus for introduction of shRNAs into NSCLC cells, HEK-293T cells were transfected with shRNA lentivirus prepared in the pLKO.1 system (Addgene, Cambridge, MA), with the psPAX2 and pMD2.G packaging plasmids. Media containing lentiviral particles was collected on day 4. Subsequently, lung cancer cells were infected with lentivirus and selected by growth in RPMI 1640 with 10% FBS and puromycin, using standard methods.

**cDNA ORF Sequences.** cDNA ORF inserts were obtained from OriGene (Rockville, MD). See Supplementary Table S4 for sequences used.

**TCGA Analysis.** The Cancer Genome Atlas (TCGA) results shown in this study are based upon provisional data generated by the TCGA Research Network (<http://cancergenome.nih.gov/>). Expression data for the 59 tumor-normal paired samples for the lung adenocarcinoma study were downloaded from <https://tcga-data.nci.nih.gov/>. Z-score corresponds to the mRNA expression of the tumor sample minus the mean expression in the reference sample divided by the standard deviation of expression in the reference sample.

**Kaplan-Meier analysis for overall survival (OS).** Was performed using <http://kmplot.com> online software with JetSet option for the optimal MSI2 probe, auto select for the best cutoff and censure at threshold settings applied (5).

**Mouse models for tumor growth.** All experiments involving mice were performed according to protocols approved by Institutional Animal Care and Use Committees (IACUCs) at M.D. Anderson Cancer Center or the Fox Chase Cancer Center. Orthotopic xenograft experiments were performed in syngeneic wild type 129Sv mice of at least 6 weeks of age. Intrathoracic injections of  $10^6$  cells into the left lung in single-cell suspension were placed in a volume of 100  $\mu$ l of complete media as previously described (1). Animals were monitored regularly and euthanized on day 28. Necropsies were performed to quantify the number of metastases to mediastinal lymph nodes, chest wall and distant extrathoracic sites.

For sub-cutaneous xenografts, immunocompromised eight week-old C.B17 SCID mice were inoculated

subcutaneously with shRNA-transfected derivatives of 344SQ syngeneic lung cancer cells into the left and right flank subcutaneously using a 27G needle, 100 ul volume. Mice were palpated twice a week after tumor cells implantation to assess tumor onset. Tumor volume was determined by external caliper twice a week (body weight also was monitored twice weekly), the greatest longitudinal diameter (length) and the greatest transverse diameter (width) were determined. Tumor volumes based on caliper measurements were calculated by the modified ellipsoidal formula:  $Tumor\ volume = 1/2(length \times width^2)$ . After three weeks mice were euthanized and tumors and lungs were collected.

**Tissue preparation, Histology, Quantitative Analysis.** Lungs and tumors were collected. Tissues were collected and fixed in 10% phosphate-buffered formaldehyde (formalin) 24-48 hrs, dehydrated and embedded in paraffin. Tissues were processed by dehydration in a series through ethanol followed by xylene (70% ethanol, 3 hr; 95% ethanol, 2 hr; 100% ethanol, 2 hr; ethanol-xylene, 1hr; xylene, 3hr) then immersed in paraffin. Paraffin blocks were cut into 5  $\mu$ m sections, mounted on microscope slides, and stored at room temperature until used. Prepared specimens were analyzed by hematoxylin and eosin (H&E) staining (Sigma-Aldrich, St. Louis, MO). Tumor sections were immunostained with antibodies to Ki-67 (DAKO, Carpinteria, CA) to allow quantitation of proliferation, and with antibodies to cleaved caspase (Cell Signaling, #9661) to allow quantitation of apoptosis. Immunohistochemistry and H&E were performed by standard protocols. Immunostained slides were scanned using an Aperio ScanScope CS scanner (Aperio, Vista, CA) and Vectra Automated Quantitative Pathology Imaging System (Perkin Elmer, Waltham, MA). Scanned images then were viewed with Aperio's image viewer software (ImageScope). Selected regions of interest were outlined manually by a pathologist (KQ Cai). Expression levels of the proliferative index marker Ki-67 or the cleaved caspase indicator of apoptosis were quantified using Vectra Automated Quantitative Pathology Imaging System specific protocols and algorithms. H-score was calculated as follows: the percentage of cells at each staining intensity level was calculated, and an H-score was assigned and calculated for each slide using the following formula:  $[1 \times (\% \text{ cells } 1+) + 2 \times (\% \text{ cells } 2+) + 3 \times (\% \text{ cells } 3+)](2, 3)$ . H-scores were subsequently used for results analysis. The area of lung metastases was assessed using the Vectra automated multispectral slide analysis system, using specific protocols and algorithms designed for the identification of tumor tissue.

**Tissue Microarrays (TMAs)** Non-small cell lung cancer surgical specimens resected from 1997 to 2012 from the Fox Chase Cancer Center (FCCC) Biosample Repository Facility were used to construct tissue microarrays (TMA). Tissue from each tumor was placed in two unique spots on each TMA. All samples were obtained from primary tumors and/or nodal metastases at the time of initial resection. Clinical information (Supplementary Table S3) was available from the repository database and abstracted from clinical databases in an anonymized fashion. At the time of tissue acquisition, patients provided Institutional Review Board (IRB)-approved informed consent for storing tissue and reviewing de-identified clinical data. For TMAs, automated image capture was performed by the HistoRx PM-2000 (HistoRx) (New Haven, CT), using the AQUAsition software. High-resolution monochromatic digital images of the cytokeratin staining visualized with AF555, DAPI, and target staining with Cy5 were captured and saved for each tumor histospot. Tumor mask was created from the cytokeratin image of each histospot, representing areas of the epithelial tumor. Histospots were excluded if the tumor mask represented less than 5% of the total histospot area. DAPI immunoreactivity defined the nuclear compartment. Images were visually inspected and cropped for unfavorable factors such as "out of focus," debris, or damaged specimen before automatic analysis. An AQUA score was generated by dividing the sum of target signals within the tumor mask. AQUA scores were normalized to the exposure times and bit depth at which the images were captured, allowing scores collected at different exposure times to be compared directly. The nuclear scores from two non-overlapping images were averaged for each case.

**Paired Analysis of NSCLC specimens.** Non-small cell lung cancer surgical specimens from the University of New Mexico Human Tissue Repository Facility (HTR) were used to conduct IHC. All samples were obtained from normal lung, primary tumors and/or nodal or distant metastasis at the time of initial resection. Clinical information (Supplementary Table S3) was available from the repository database and

abstracted from clinical databases in an anonymized fashion. At the time of tissue acquisition, patients provided Institutional Review Board (IRB)–approved informed consent for storing tissue and reviewing de-identified clinical data. IHC slides stained for MSI2 were analyzed using APERIO Spectrum scanner (Leica Biosystems, Buffalo Grove, USA).

**SDS-PAGE and Western Blots.** For Western blotting, cells were disrupted in CellLytic M lysis buffer (Sigma-Aldrich, St. Louis, MO) supplemented with protease and phosphatase inhibitor cocktails (Roche, Basel, Switzerland). Whole cell lysates were used directly for SDS–PAGE and Western blotting, using standard procedures. Primary antibodies included rabbit anti-MSI2 (Abcam #ab76148), anti-MSI1 (Abcam #ab52865), anti-NUMB (Abcam #ab14140), anti–FN1 (Abcam #ab6328), anti-TGF $\beta$ R1 (Cell Signaling #3712), anti-SMAD3 (Cell Signaling #9523) and anti-SMAD3p (Cell Signaling #9520), Claudin-7 (Novus #67525), Claudin-3 (Abcam #ab15102), Claudin-5 (Abcam, #ab15106), FN1 (Abcam #ab6328), anti-E-Cadherin (Cell Signaling #3195), anti- $\beta$ -Actin (Abcam #ab49900), anti-ZEB1 (Cell Signaling #3396), anti-ZEB2 (Santa Cruz #271984), anti-FOXC2 (Abcam #65141), anti-SNAIL (Abcam #180714), anti-SLUG (Abcam #51772), anti-VMN (Cell Signaling #5741). Secondary anti-mouse and anti-rabbit horseradish peroxidase–conjugated antibodies (GE Healthcare, Little Chalfont, UK) were used at a dilution of 1:10,000 for visualization of Western blots and blots developed by chemiluminescence using the West-Pico system (Pierce, Waltham, MA). Image analysis was done using ImageJ (National Institutes of Health, Bethesda, MD), with signal intensity normalized to  $\beta$ -actin or total level of detected proteins. Data was analyzed in Excel by paired t-test to determine statistical significance.

**Immunofluorescence.** Cells were fixed with 4% paraformaldehyde (10 min) and then cold methanol (5 min), permeabilized with 1% Triton X-100 in PBS and blocked with 3–5% BSA in PBS. Samples were then incubated with the primary antibodies overnight at 4°C. Primary antibodies were: anti-Claudin-7 (Novus #67525), anti-Claudin-3 (Abcam #ab15102) and anti E-Cadherin (BD Transductions 610182). Following rinse in PBS + 0.01% Tween, samples were incubated for 1 hour with an Alexafluor 488, 568 or 647 tagged donkey anti-rabbit, mouse, or goat secondary antibody (Life Technologies, Eugene, OR), and counterstained with a 2  $\mu$ mol/L 4', 6-diamidino-2-phenylindole (DAPI) (Life Technologies, #1652731, Eugene, OR) solution. Samples were imaged using a Nikon C1 Spectral confocal microscope (Nikon, Melville, NY) equipped with a numerical aperture (NA) 1.40, oil immersion, 63x Plan Apo objective (Nikon). Images were acquired at room temperature using EZ-C1 3.8 (Nikon) software and analyzed with MetaMorph (Molecular Devices, Union City, CA).

**Analysis of cell migration.** Time-lapse multifield experiments were performed in phase contrast on an automated inverted Nikon Eclipse TE300 microscope equipped with thermal and CO<sub>2</sub> regulation (Nikon, Melville, NY). 2  $\times 10^6$  cells of each clone were plated on a 6 well plate a day prior to imaging. The next morning cells were “scratched” with a p200 pipet tip. Immediately after, the cells were imaged at 15 minute intervals with a 100 $\times$  objective and a CCD camera (EZ CoolSnap, Roper) and then “stacked” into movies using Metamorph (Universal Imaging) software. The videos were analyzed using the ImageJ public domain software (<http://imagej.nih.gov/ij/docs/guide/146.html>). Visual fields were divided into different coordinates and the distance between the invasion fronts of the cells was measured at each of the assigned longitudes at 0, 1, 3, 6, 9 and 12 hour time points. The distance was then converted from pixels into millimeters using a premeasured scale bar (1mm= 406,001 pixels) and normalized to 0 hour being 1 for each video. Statistical differences were calculated for each time point using Excel software, t-test.

As a second approach, the upper chambers of migration chambers (3465-024-K Trevigen, Gaithersburg, MD) were seeded with serum-starved cells (1  $\times 10^5$  cells per well) in triplicate wells. Medium (RPMI 1640/DMEM), with 10% FBS, was placed in the lower and upper chambers, respectively. Mitomycin C at a concentration of 10  $\mu$ g/ml was added to the upper chamber to inhibit cell proliferation. Cells were incubated at 37°C for 24 hours. After incubation, the cells remaining on the upper surface of the membrane were removed with cotton swabs. The cells on the lower surface of the membrane were fixed and stained with crystal violet and visualized under a Nikon Eclipse TE 2000-U microscope at 20X magnification and CRI Nuance Multispectral Imaging System. Four visual fields were photographed and counted per chamber, and



the results were analyzed with Image J and Excel expressed as the mean relative cell count number per visual field  $\pm$  SEM with two-tailed t-test showing statistical significance.

**Cell proliferation assays.** Cells ( $1-2 \times 10^3$  cells/well) were plated in quadruplicate in RPMI1640 media with 10% FBS in 96-well cell culture plates for 5 days. On days 1-5, *CellTiter-Blue*<sup>®</sup> (Promega, Fitchburg, WI) or WST-1 Sigma-Aldrich (St. Louis, MO) reagent (for the 393P cell line) were added to each well; after 2 hours incubation at 37°C, optical density readings were made in the 570 – 600 and 420-480 nm wave-length range, responsively, using *Perkin-Elmer ProXpress Visible-UV-fluorescence* 16 bit scanner (Perkin-Elmer, Waltham, MA). As a second approach to measuring proliferation  $1-2 \times 10^3$  cells for each model of interest were plated in 96-well plates, and wells fixed and stained with DAPI at 24 hour intervals from days 1-5 after plating, then scored by automated microscope (ImageXpress Micro, Downingtown, PA).

**Cell invasion assay.** The upper chambers of growth factor–reduced Matrigel invasion chambers (354483; BD Biosciences, Franklin Lakes, NJ or 3483-024-01, Trevigen, Gaithersburg, MD) were seeded with cells ( $1 \times 10^5$  cells per well) in triplicate wells. Medium (RPMI 1640), with or without 10% FBS, was placed in the lower and upper chambers, respectively. Mitomycin C at a concentration of 10  $\mu$ g/ml was added to the upper chamber to inhibit cell proliferation. Cells were incubated at 37°C for 24 hours. Cells that had invaded through Matrigel were visualized with crystal violet. Three microscopic fields (original magnification, 10X) were photographed and counted per chamber, and the results were expressed as the mean  $\pm$  SEM of invaded cells from replicate wells and multiple independent experiments. Data was analyzed in Excel by paired t-test to determine statistical significance.

**Spheroidal growth assay:** A 3D culture sphere assay was run using the Cultrex 3D Spheroid BME Cell Invasion Assay kit (Trevigen, catalog # 3500-096-K) by the standart protocol. 344SQ and A549 were plated 1000 per well in the Spheroid Formation Extracellular Matrix with or without TGF- $\beta$  at 10 or 100 ng/ml concentration and grown for 3 days. Then the invasion matrix was added on top. On day 5 pictures were taken with the NIKON Eclipse TE 2000U microscope and CRI Nuance Multispectral Imaging System FX and then analyzed with Image J to measure the spheres' size.

**Overexpression studies.** For overexpression of MSI2, a full-length cDNA encoding MSI2 (for sequence information, please refer to NM\_138962.2) or empty vector was obtained from the human ORFeome collection and transferred to the following viral vectors via Gateway recombination and virus production following manufacturer's recommendations: pLenti63/V5 DEST (Thermo Fisher Scientific, Waltham, MA)(4). All overexpression studies were performed using newly transduced stable cell lines generated by single clone selection. In brief, MSI2 cDNA cloned into pLenti63/V5 DEST plasmid or was empty pLenti63/V5 DEST plasmid were transfected into 393p cells. Subsequently, lung cancer cells were selected by growth in RPMI 1640 with 10% FBS and selected in blasticidin. Individual clones were picked and validated for MSI2 overexpression by Western blot. For overexpression of claudin 7 (CLDN7), a lentiviral plasmid containing a full length ORF insert encoding human CLDN7, transcript variant 1(RC200530L1) was acquired from OriGene (Rockville, MD) and expressed in A549 NCLC cells using pLKO.1 system from Addgene (Cambridge, MA). Subsequently, lung cancer cells were selected by growth in RPMI 1640 with 10% FBS with puromycin and A'lenti CLDN7 cell line was validated for CLDN7 overexpression by Western blot. For overexpression of TGF $\beta$ R1, the previously generated MSI2 shRNA depleted human and mouse NSCLC A559 and 344SQ cells were transfected with lentivirally expressed ORF TGF $\beta$ R1, transcript variant 1 (CW301688, a modification of RC219514L1) from Origene, using the Addgene pLKO.1 system and selected in DMEM and RPMI 1640 with 10% FBS and blasticidin. Effectiveness of targeted gene expression in 3'-m1/T $\beta$ R1 and A-h1/T $\beta$ R1 cell lines was confirmed by Western blot analysis.

### 3. Supplementary References.

1. Onn A, *et al.* (2003) Development of an orthotopic model to study the biology and therapy of primary human lung cancer in nude mice. *Clin Cancer Res* 9(15):5532-5539.
2. Hirsch FR, *et al.* (2003) Epidermal growth factor receptor in non-small-cell lung carcinomas: correlation between gene copy number and protein expression and impact on prognosis. *J Clin Oncol* 21(20):3798-3807.
3. John T, Liu G, & Tsao MS (2009) Overview of molecular testing in non-small-cell lung cancer: mutational analysis, gene copy number, protein expression and other biomarkers of EGFR for the prediction of response to tyrosine kinase inhibitors. *Oncogene* 28 Suppl 1:S14-23.
4. Meerbrey KL, *et al.* (2011) The pINDUCER lentiviral toolkit for inducible RNA interference in vitro and in vivo. *Proc Natl Acad Sci U S A* 108(9):3665-3670.
5. Gyorffy B, *et al.* (2013) Online survival analysis software to assess the prognostic value of biomarkers using transcriptomic data in non-small-cell lung cancer, PLoSOne 18;8(12):e82241.



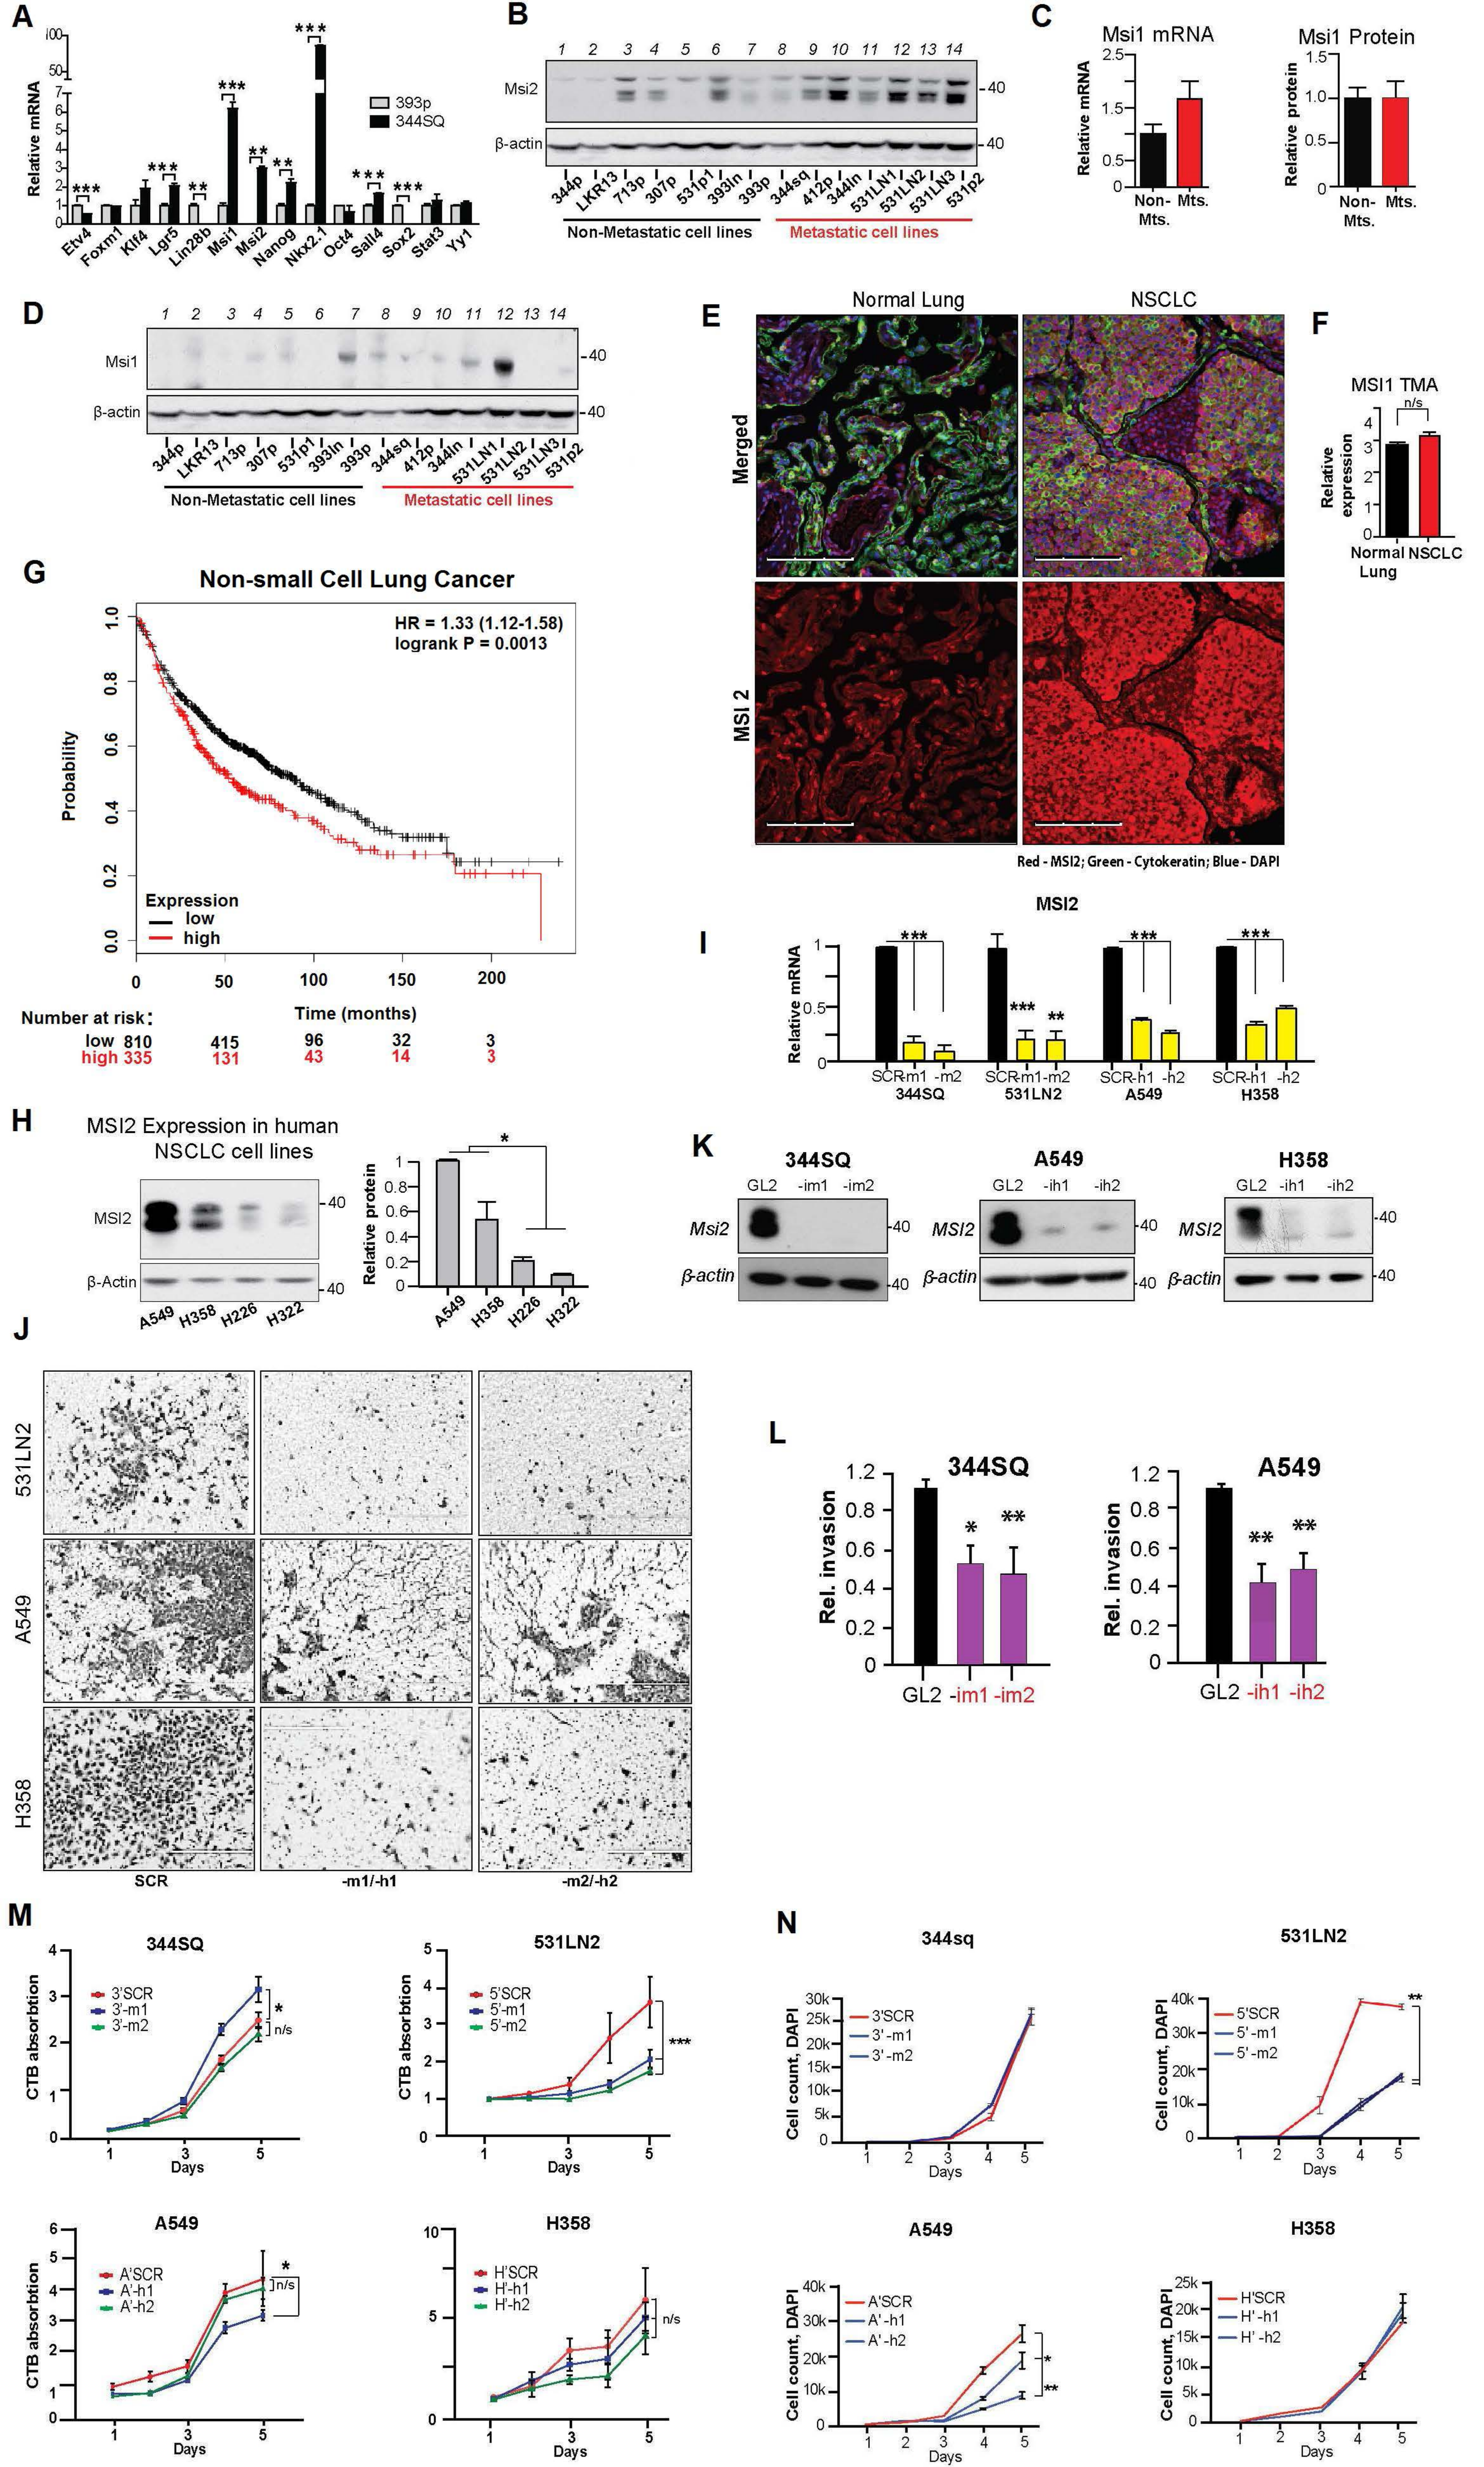



**A****344SQ Cell Line**

**TGFβ**                      0                                      10 ng/mL                                      100 ng/mL

344SQ'SCR

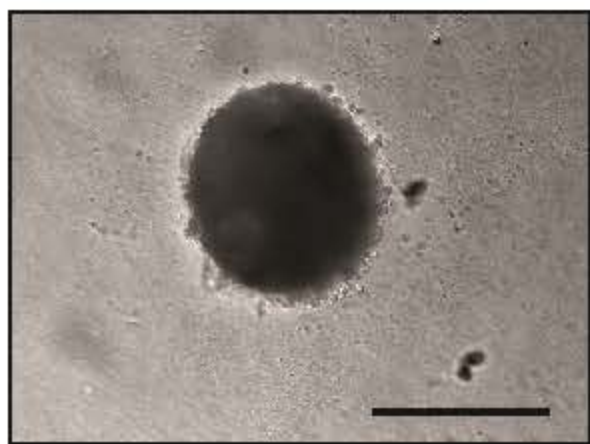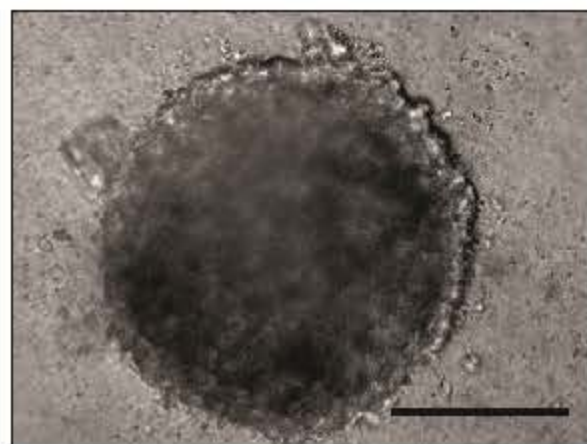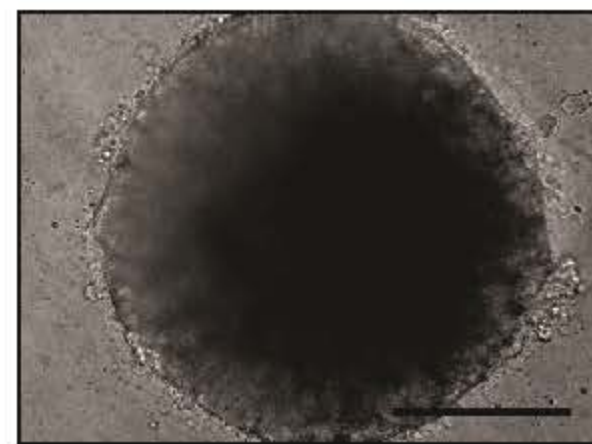

344SQ'-m1

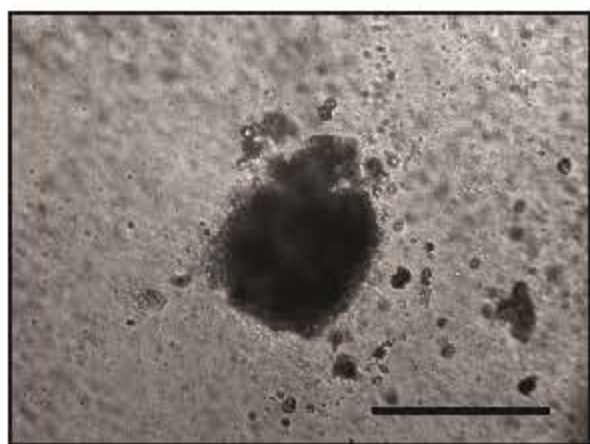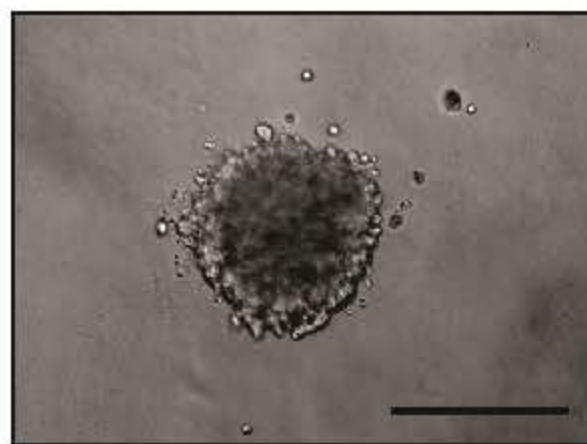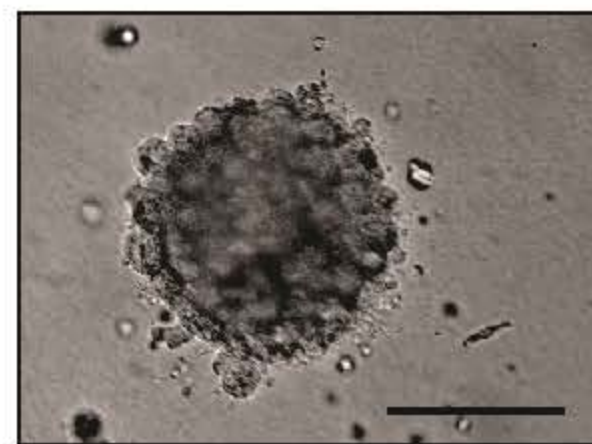

344Q'-m2

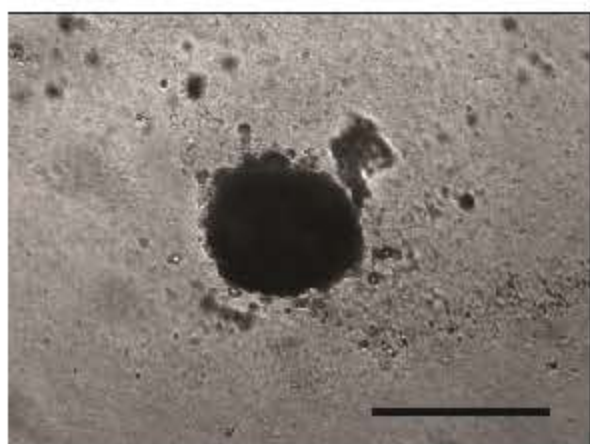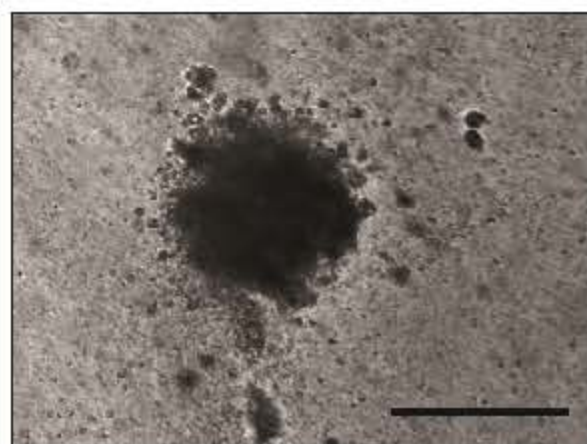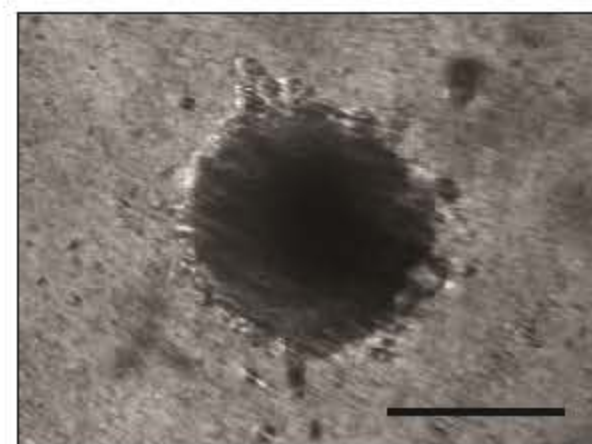**B**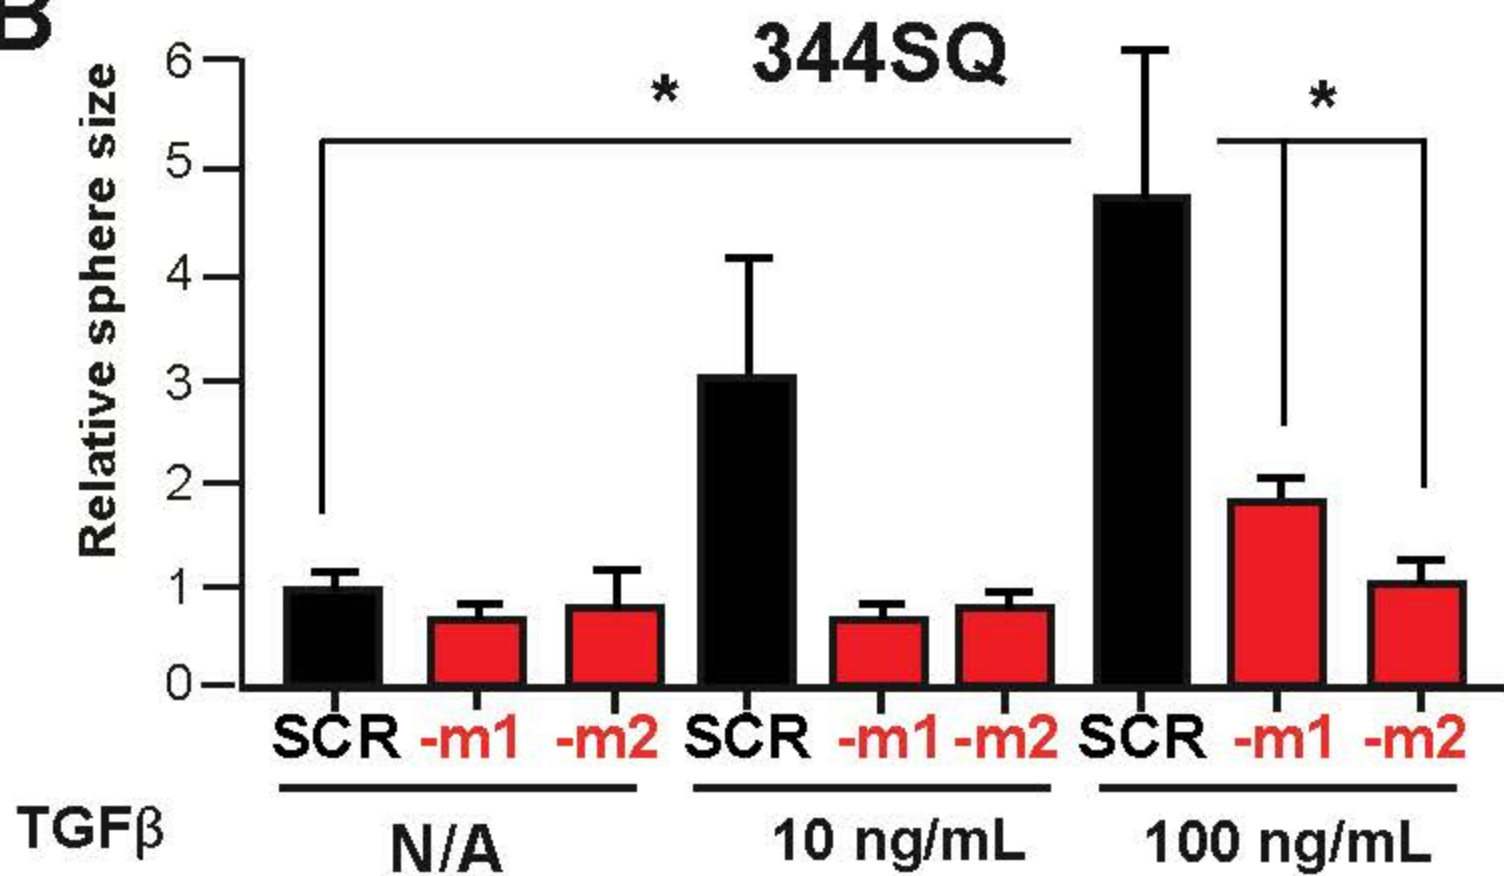



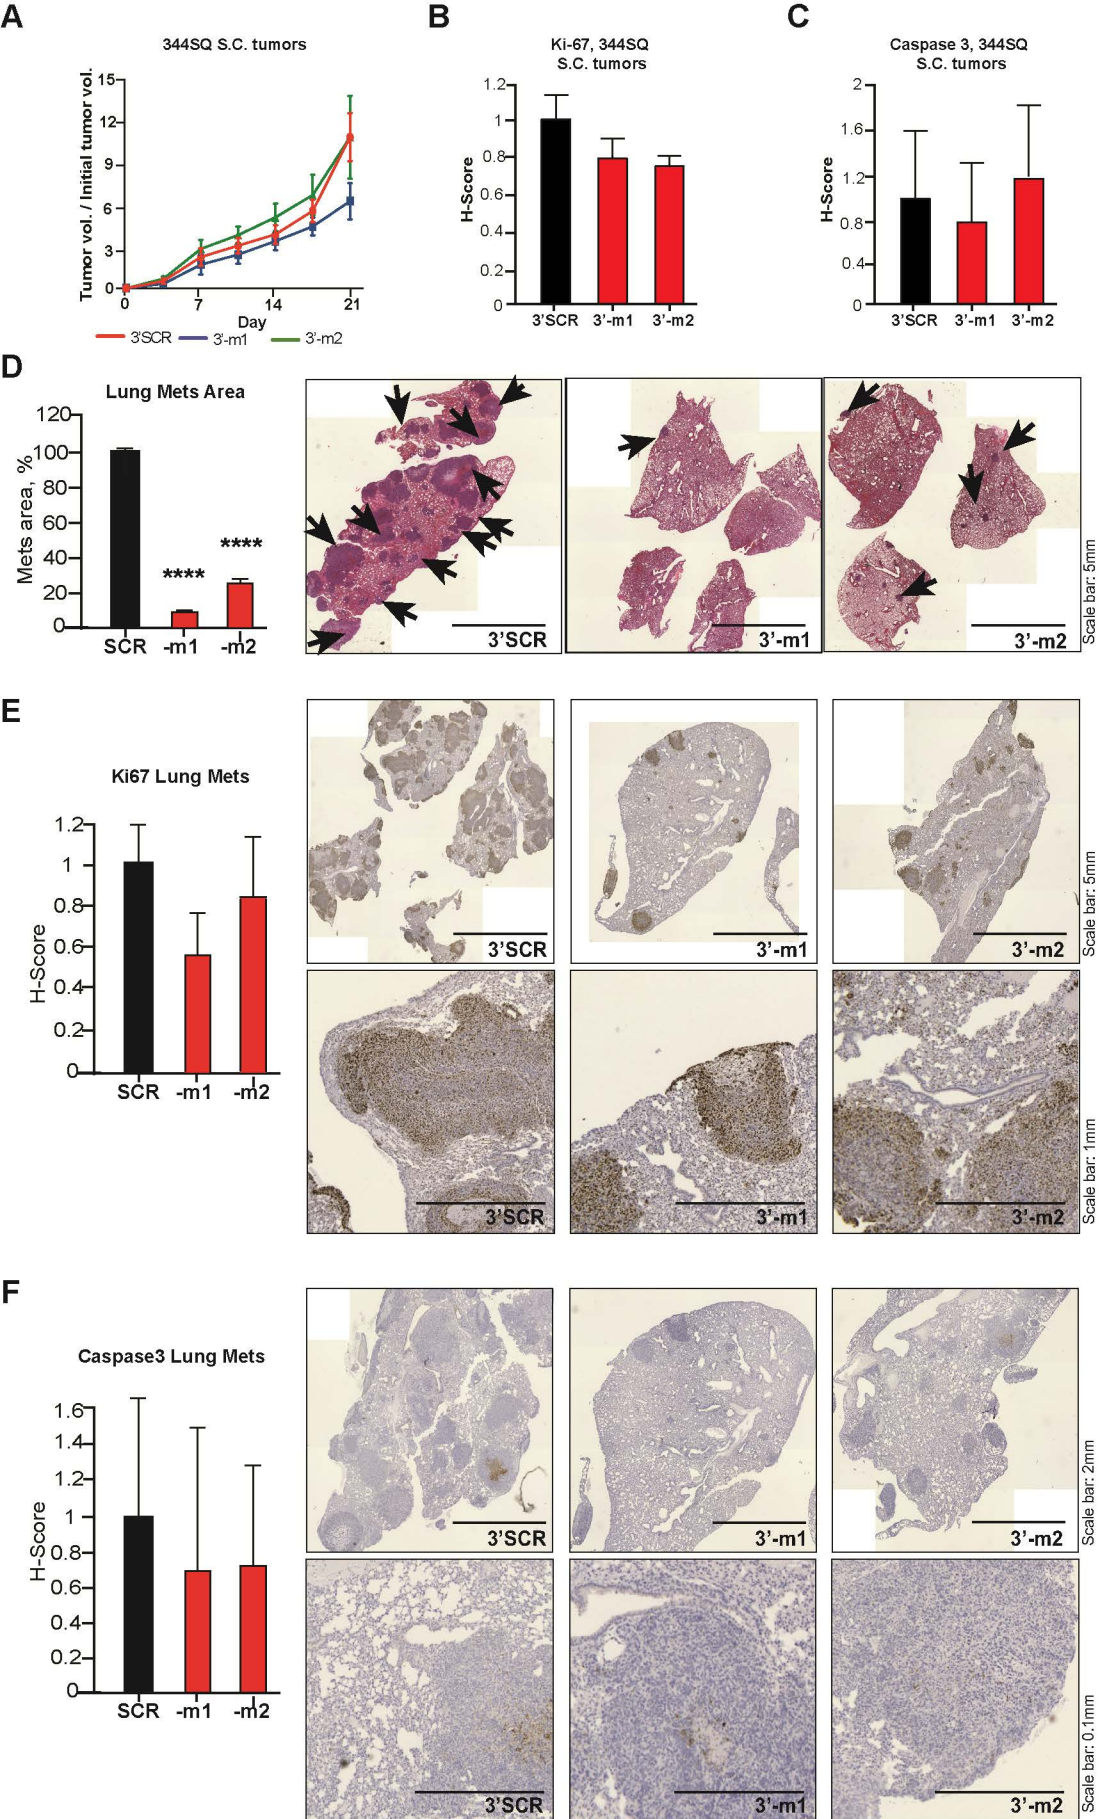



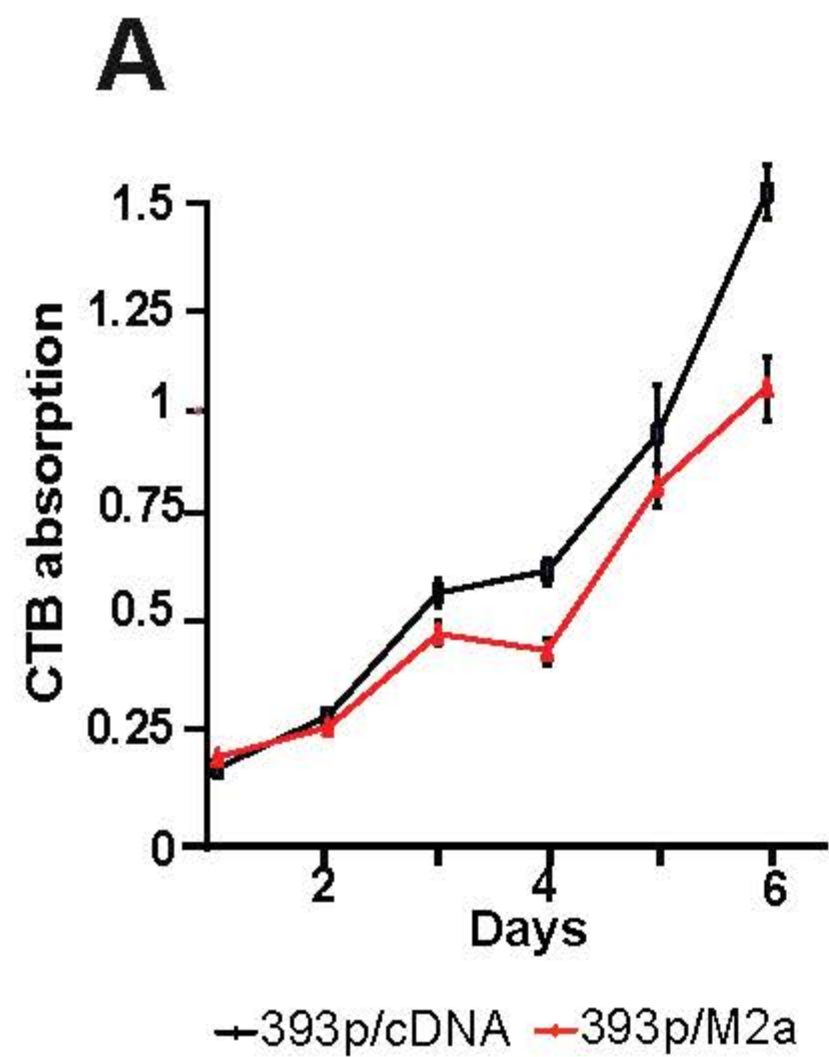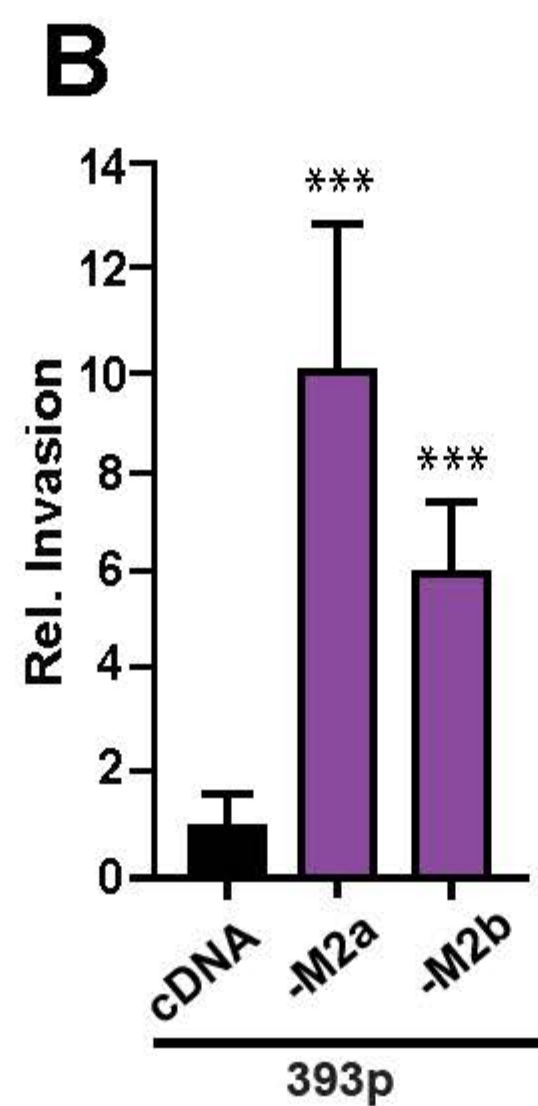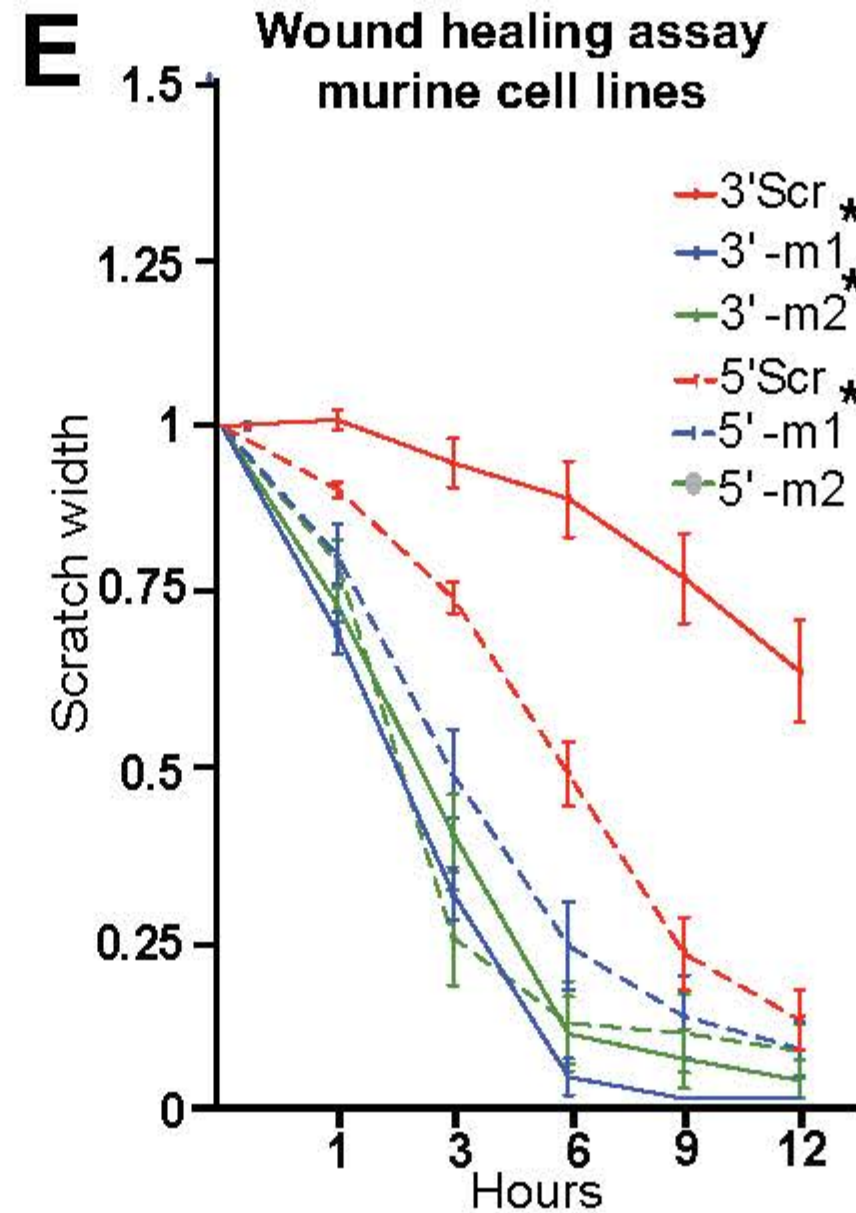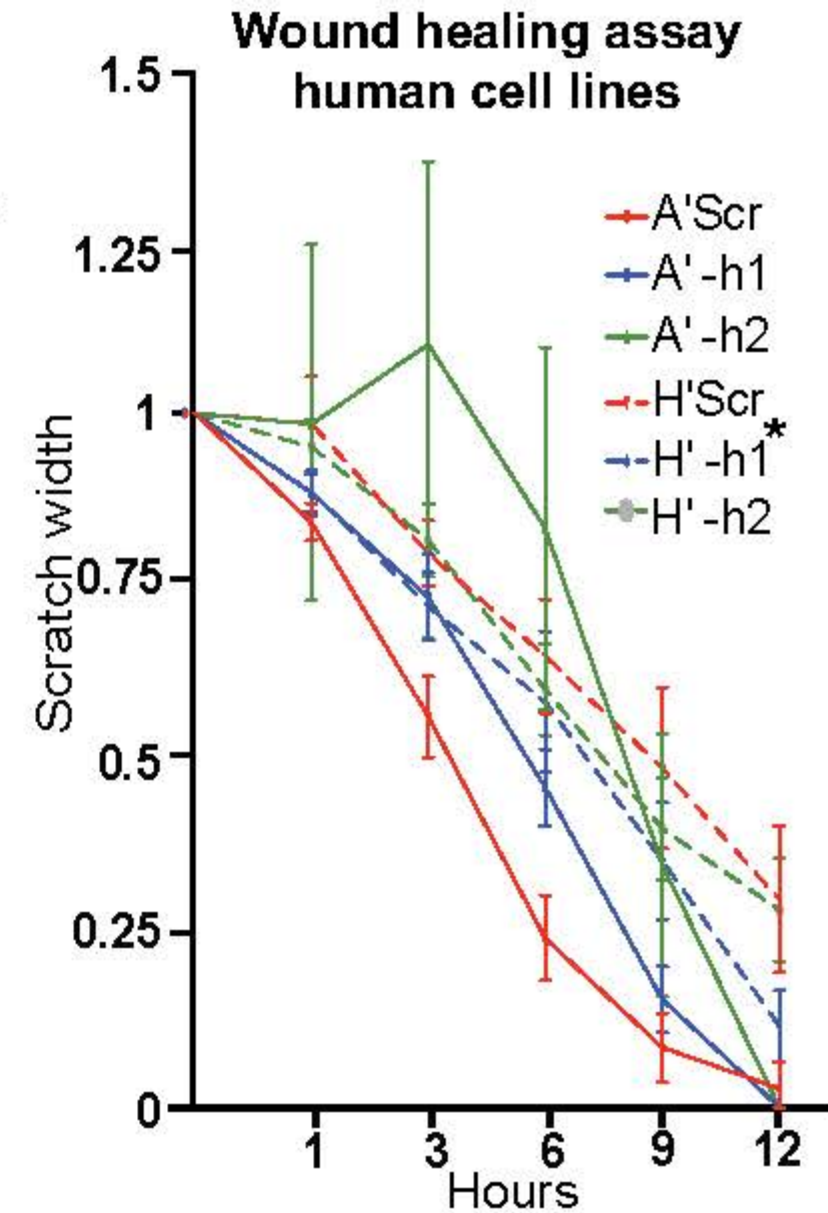

**C**

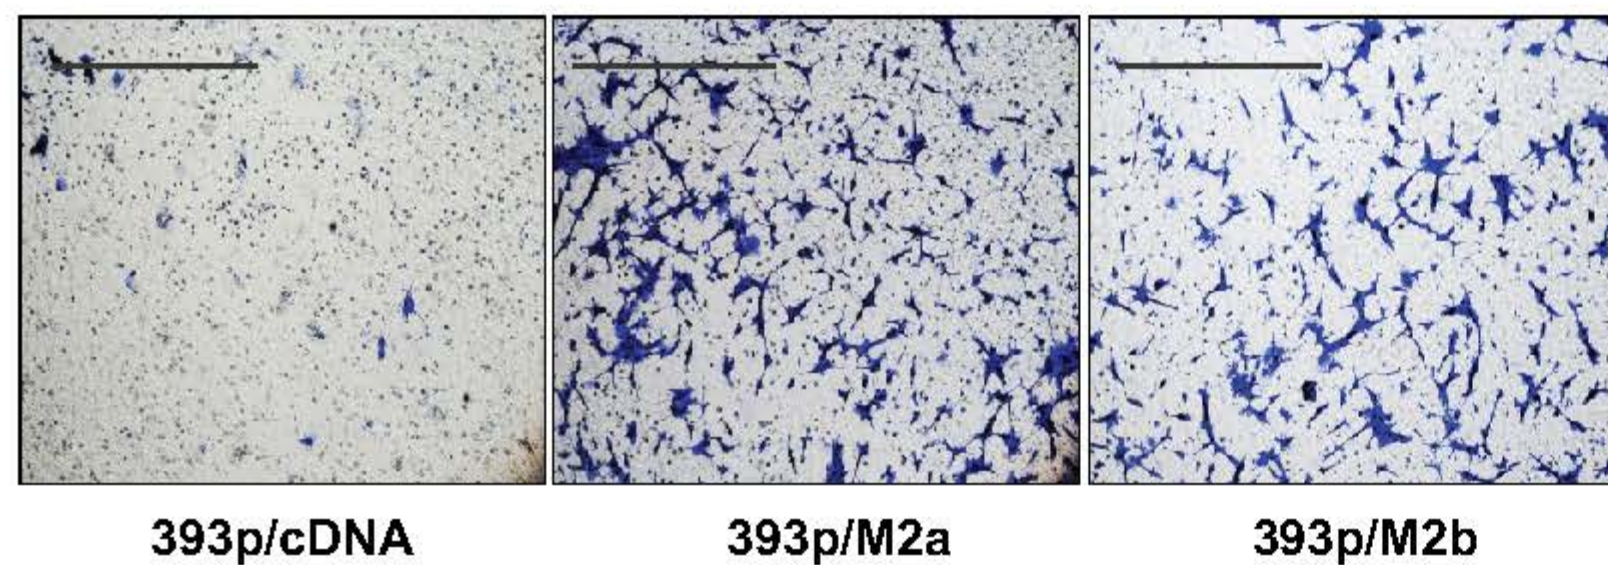

**D** Total Mets + Mediastinum LNs

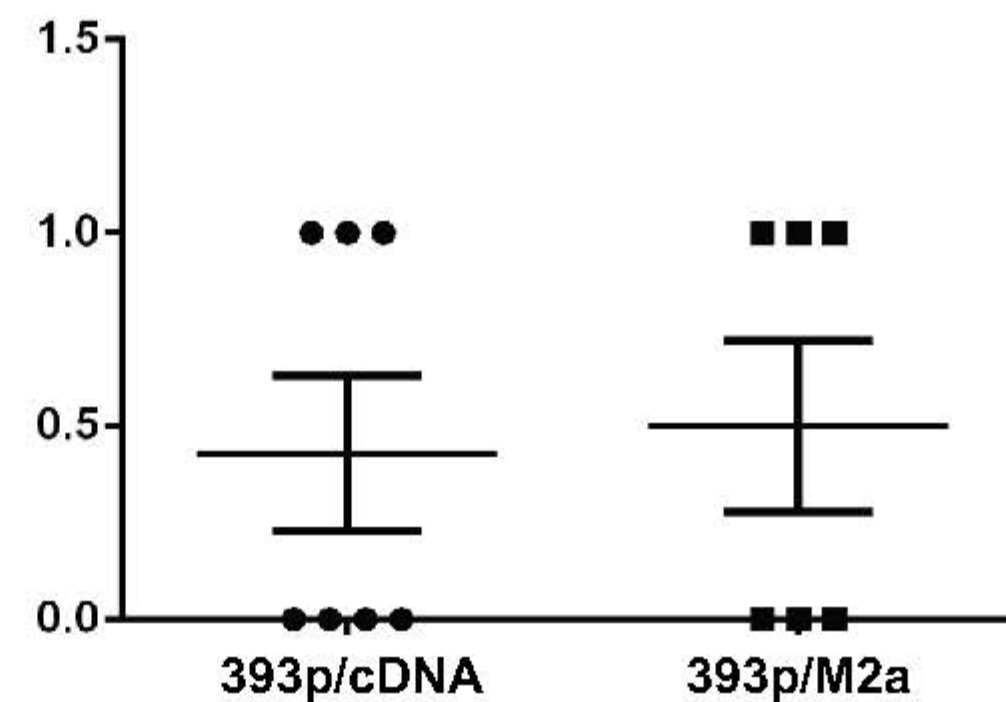

**F** Migration assay

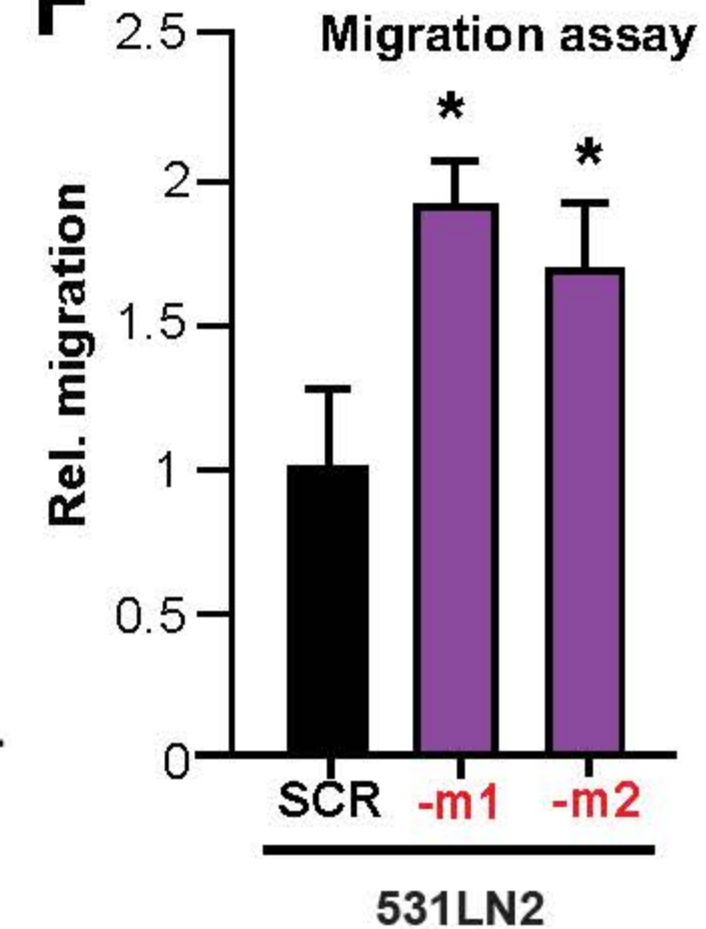

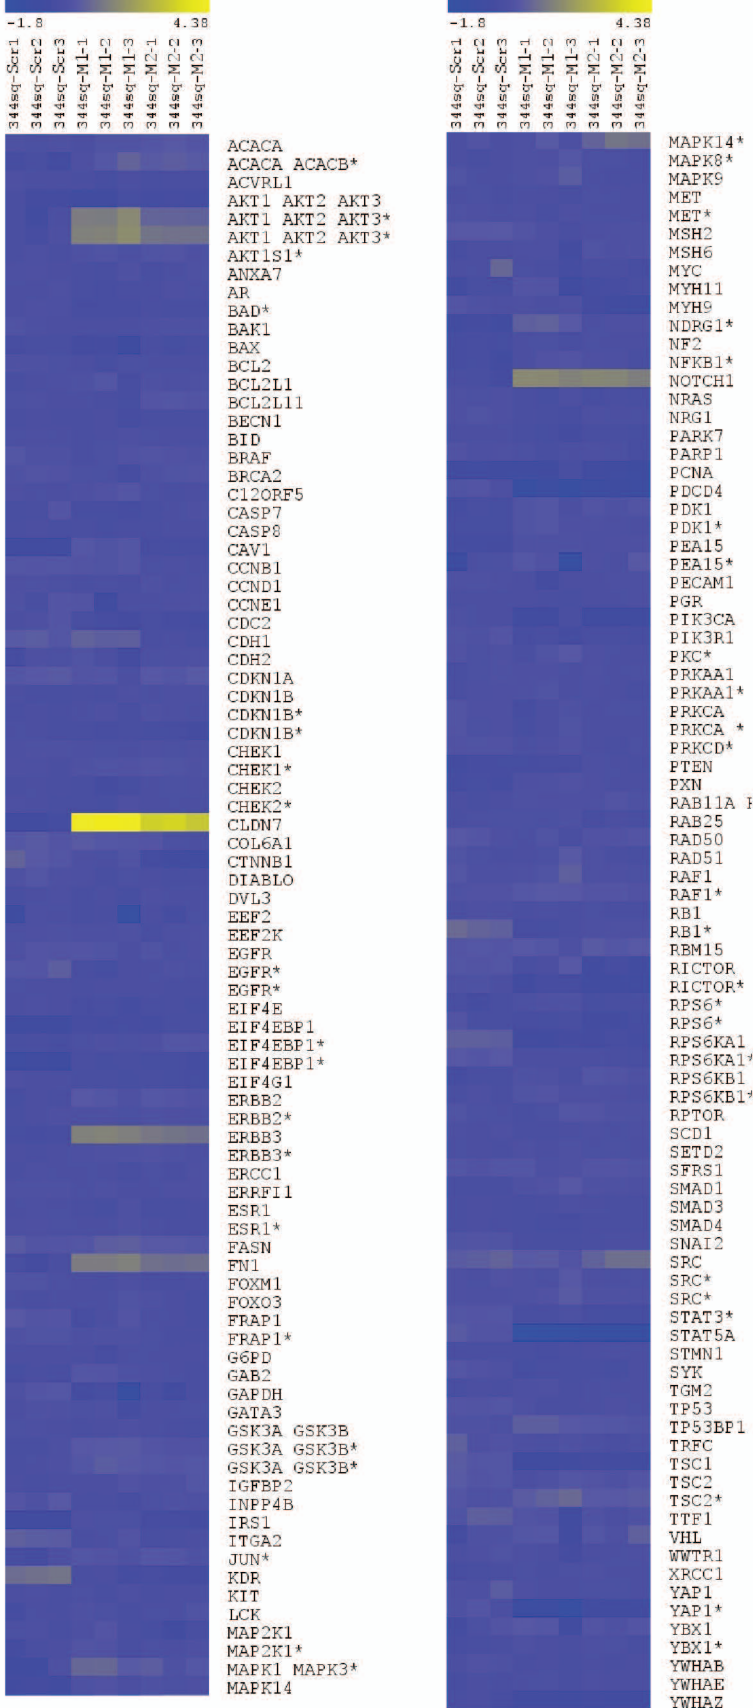

Kudinov et al, Figure S5.



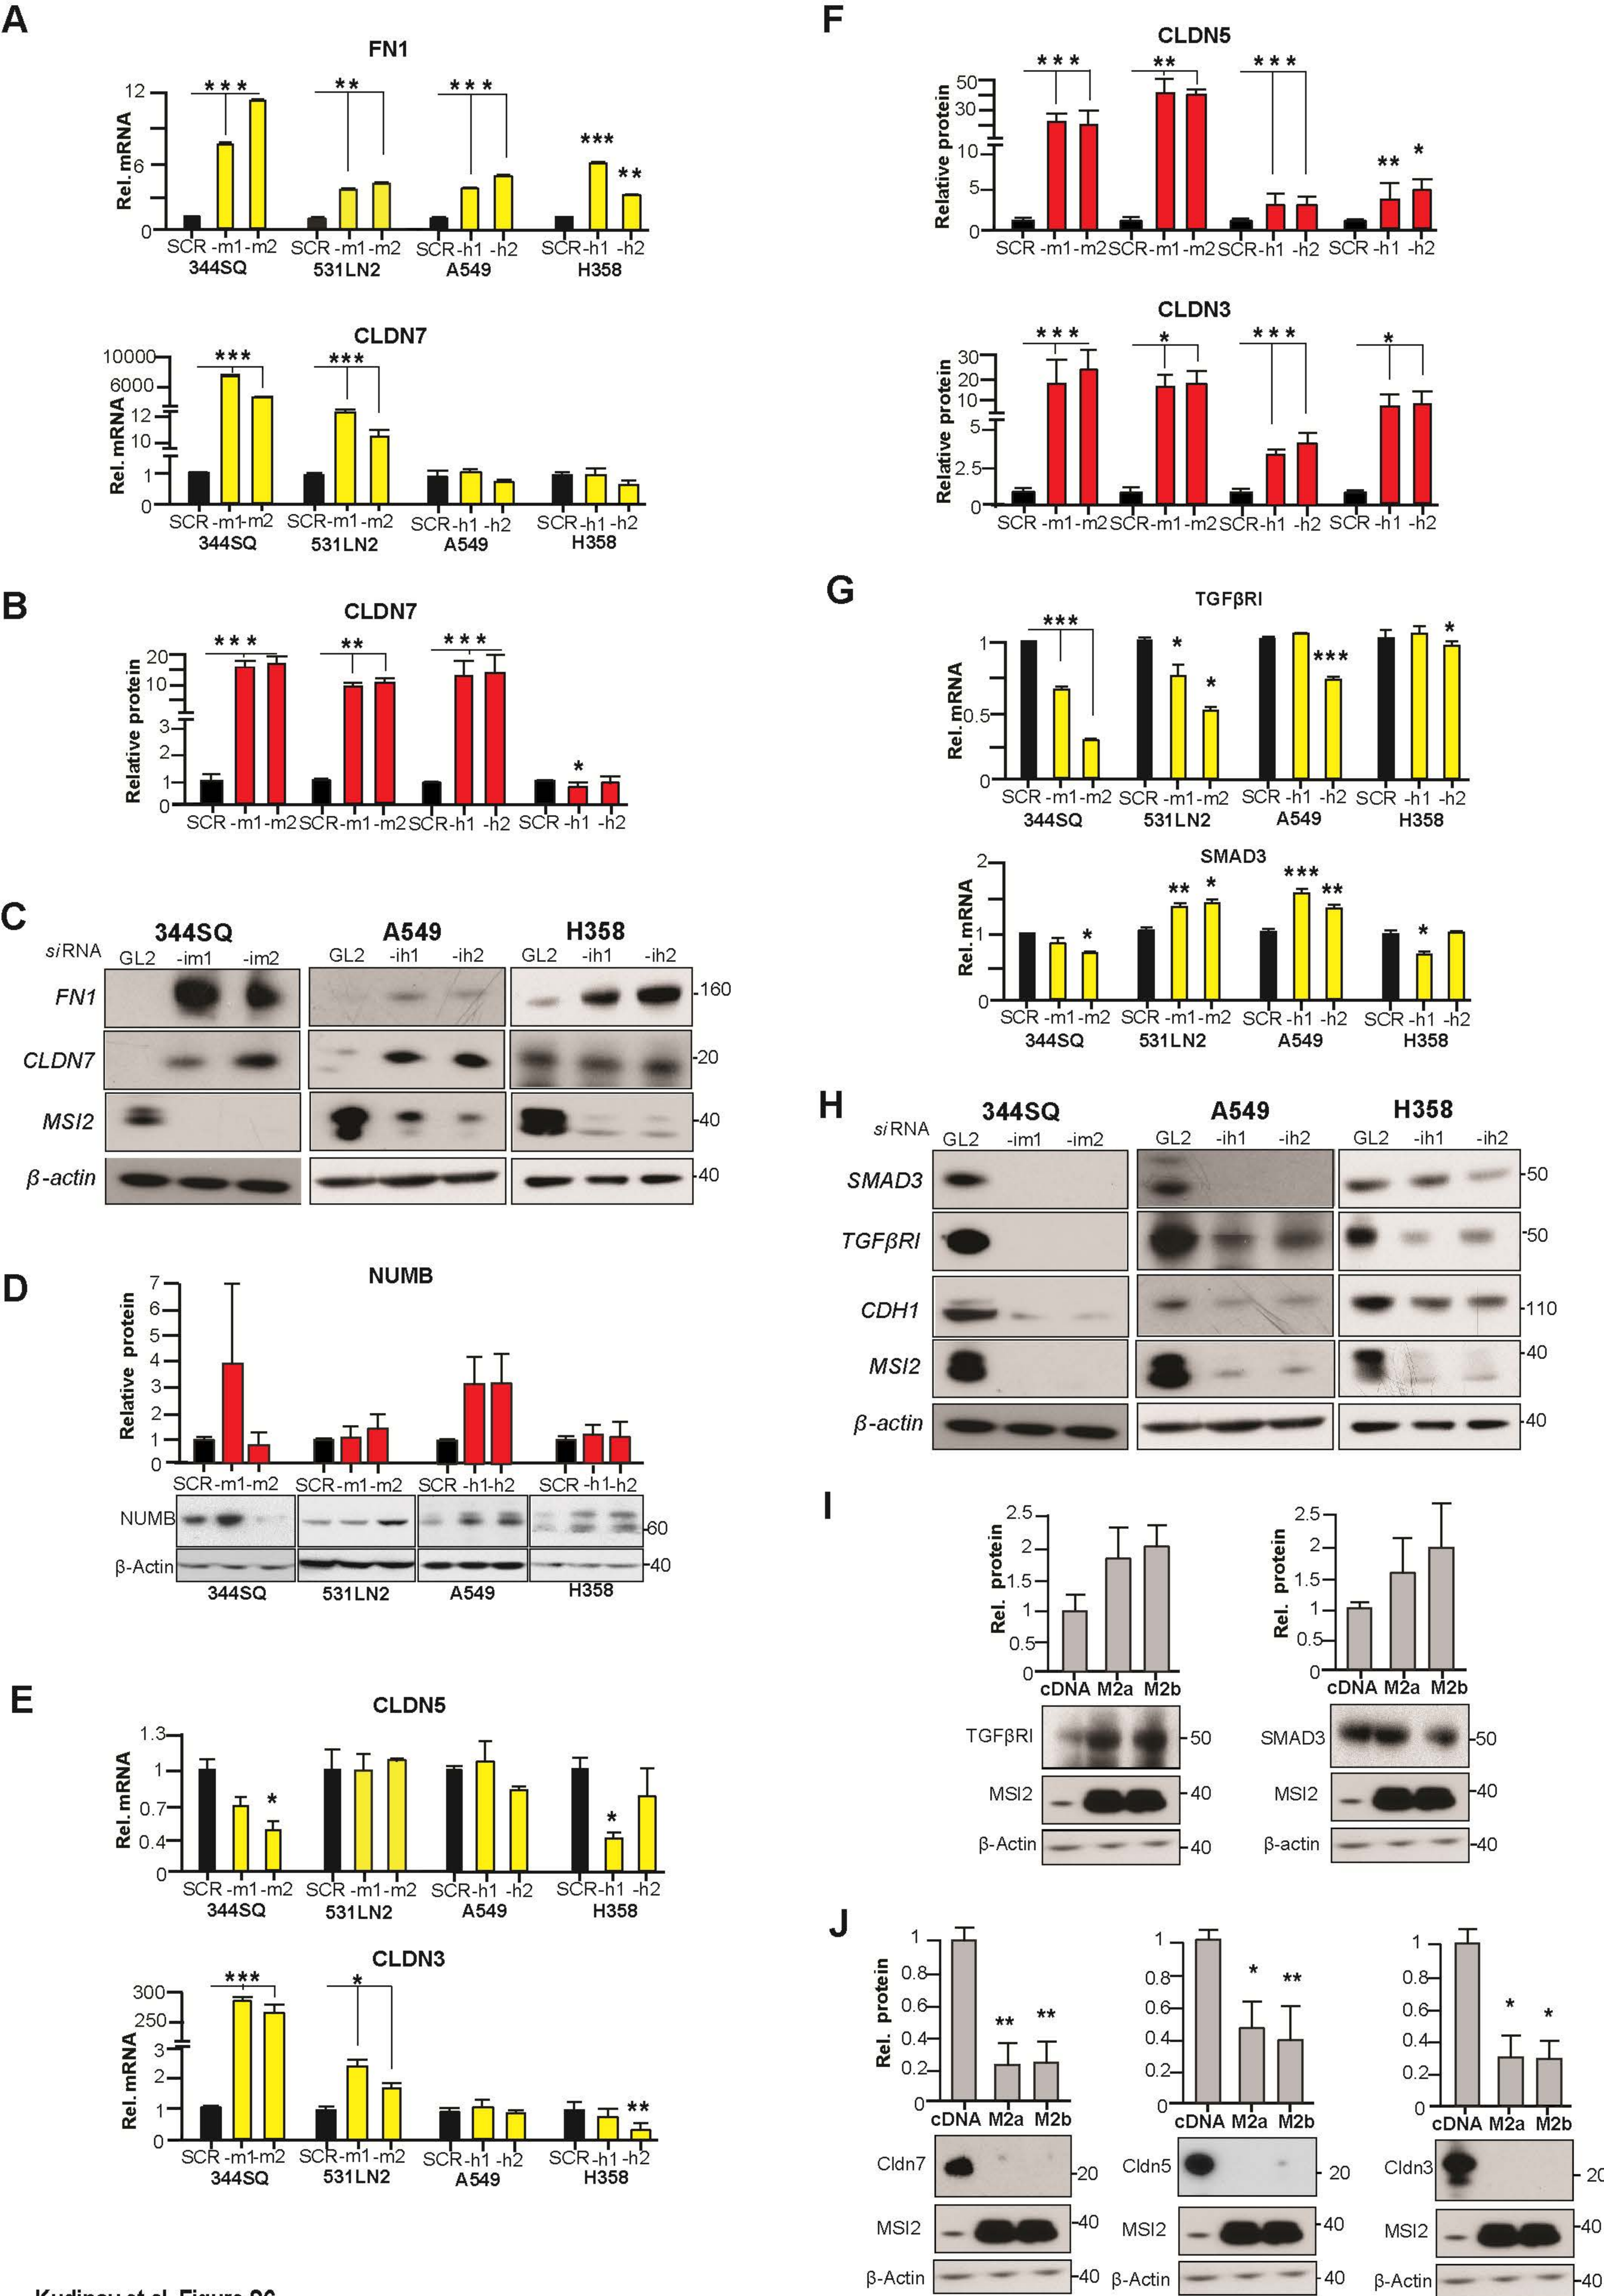



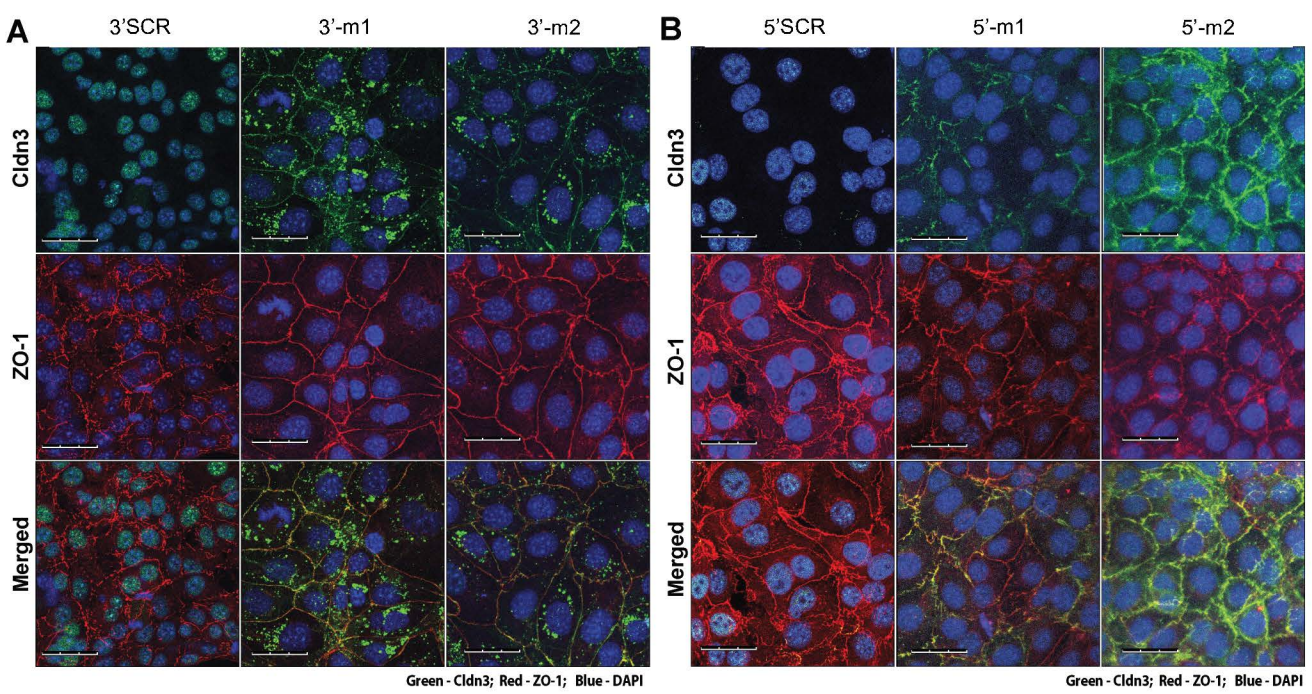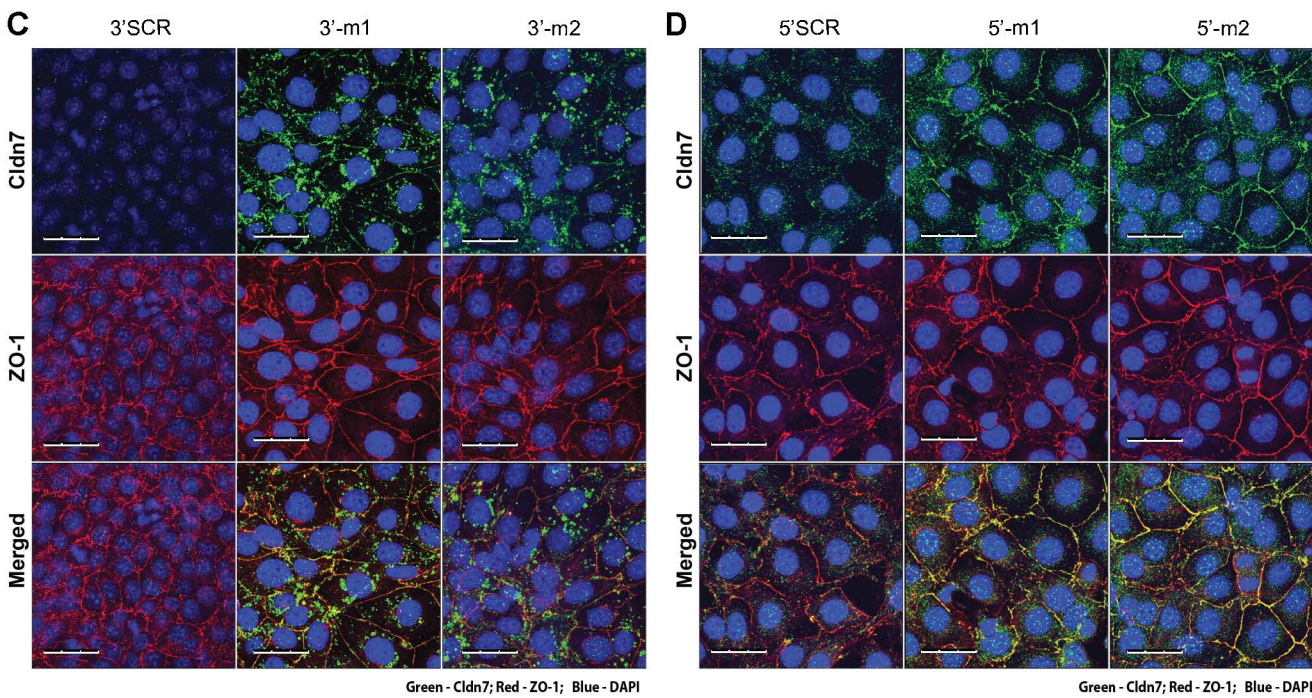



**A**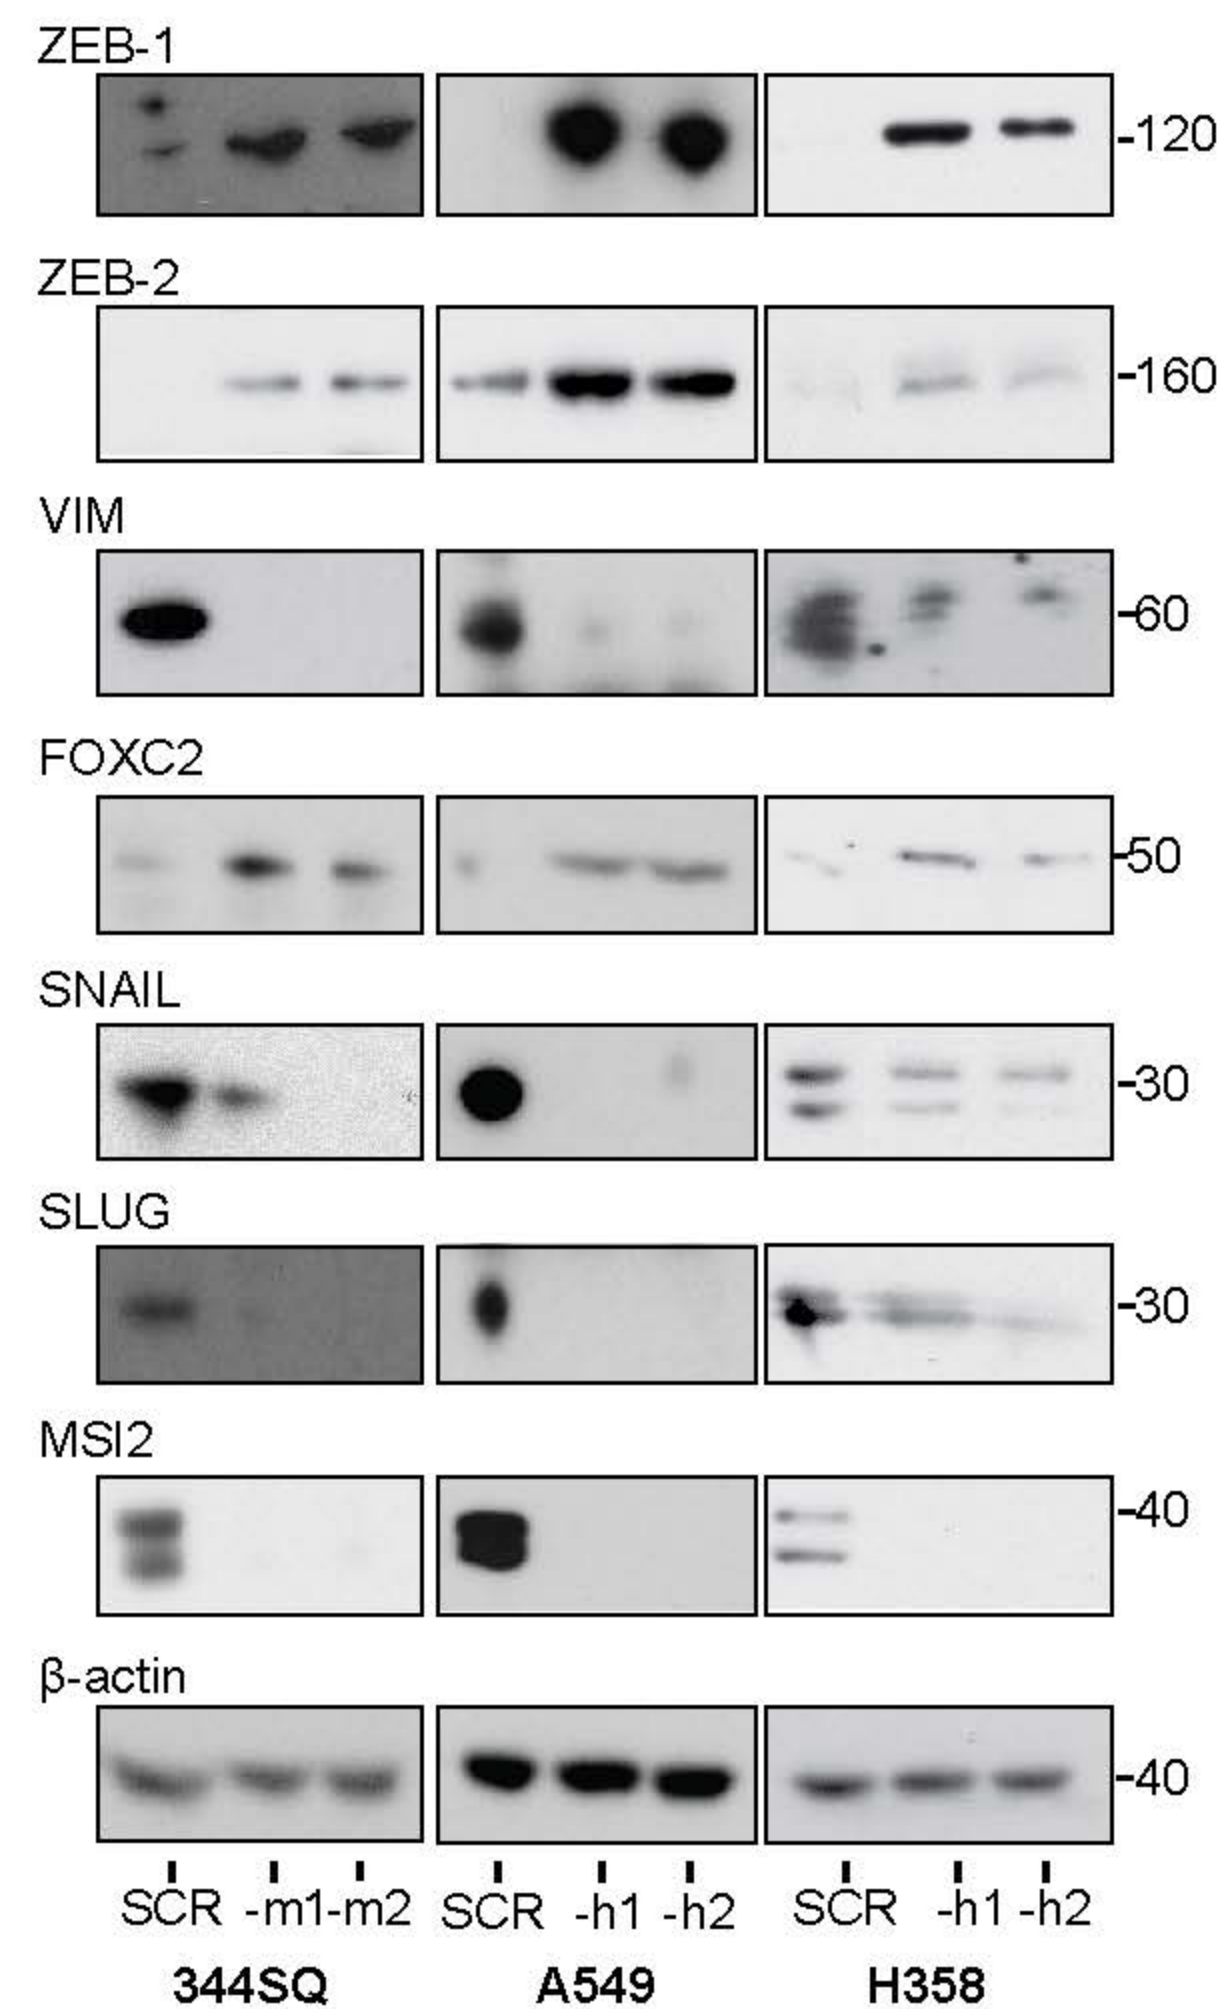**B**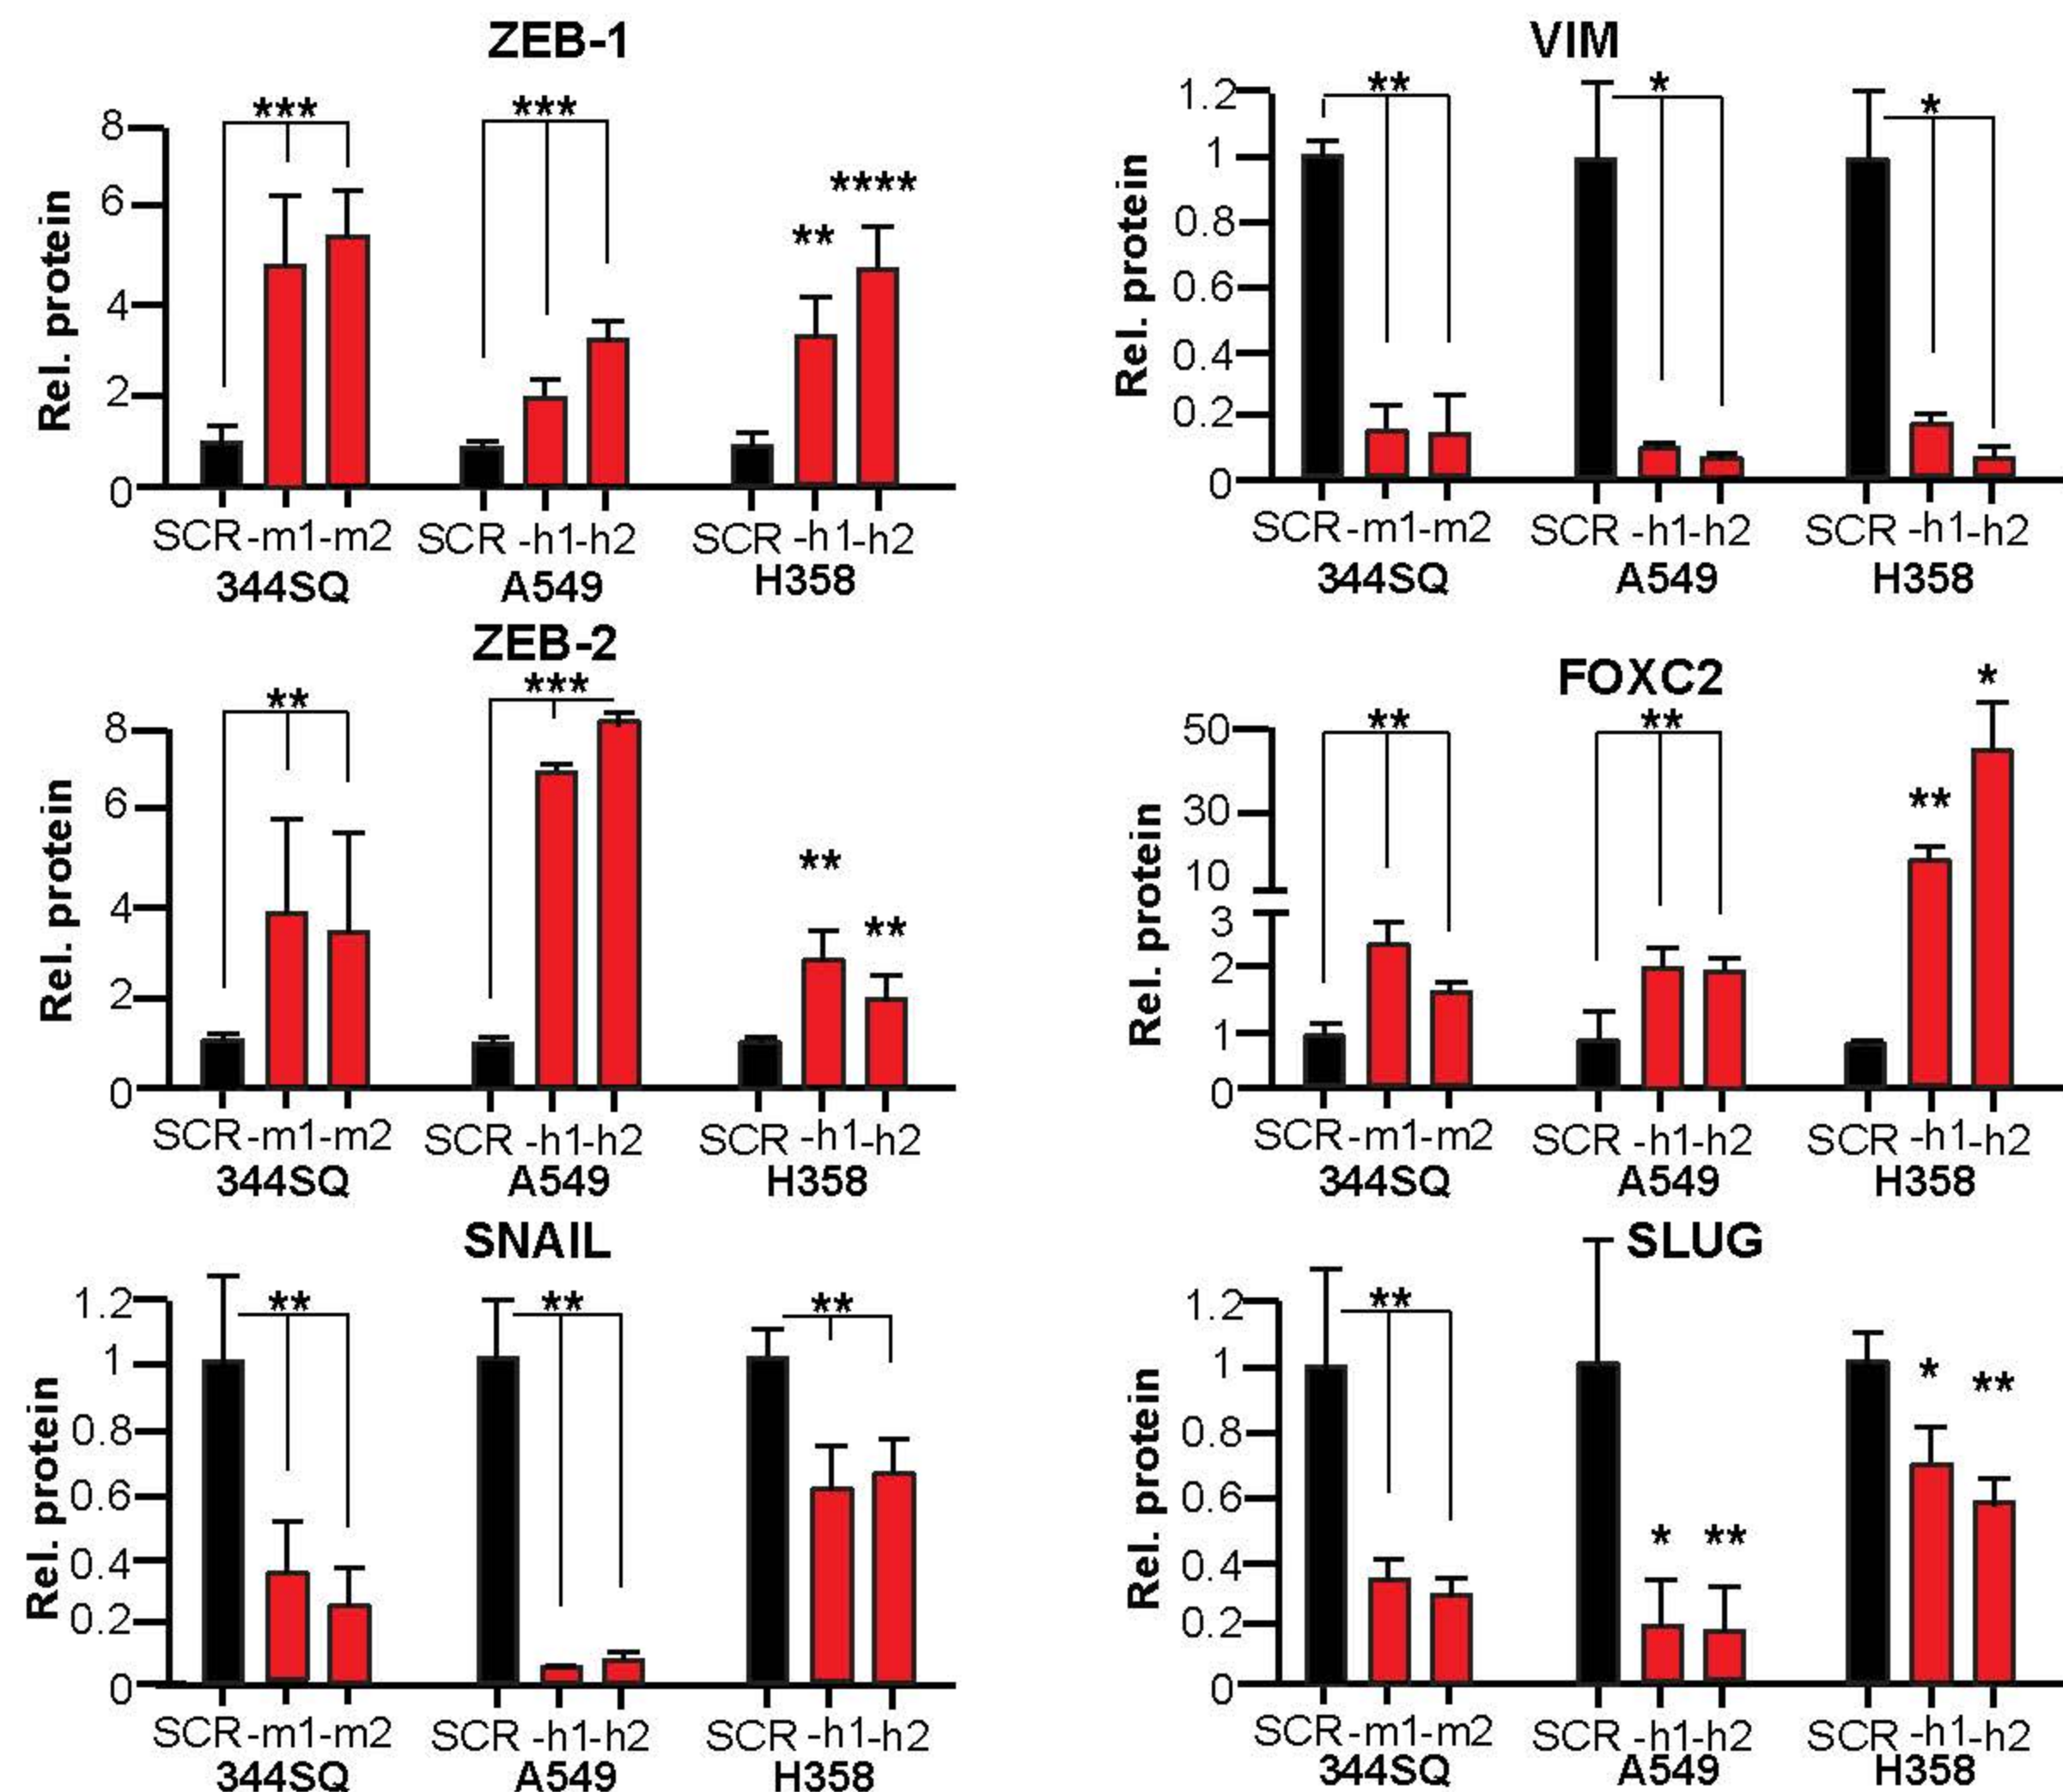**C**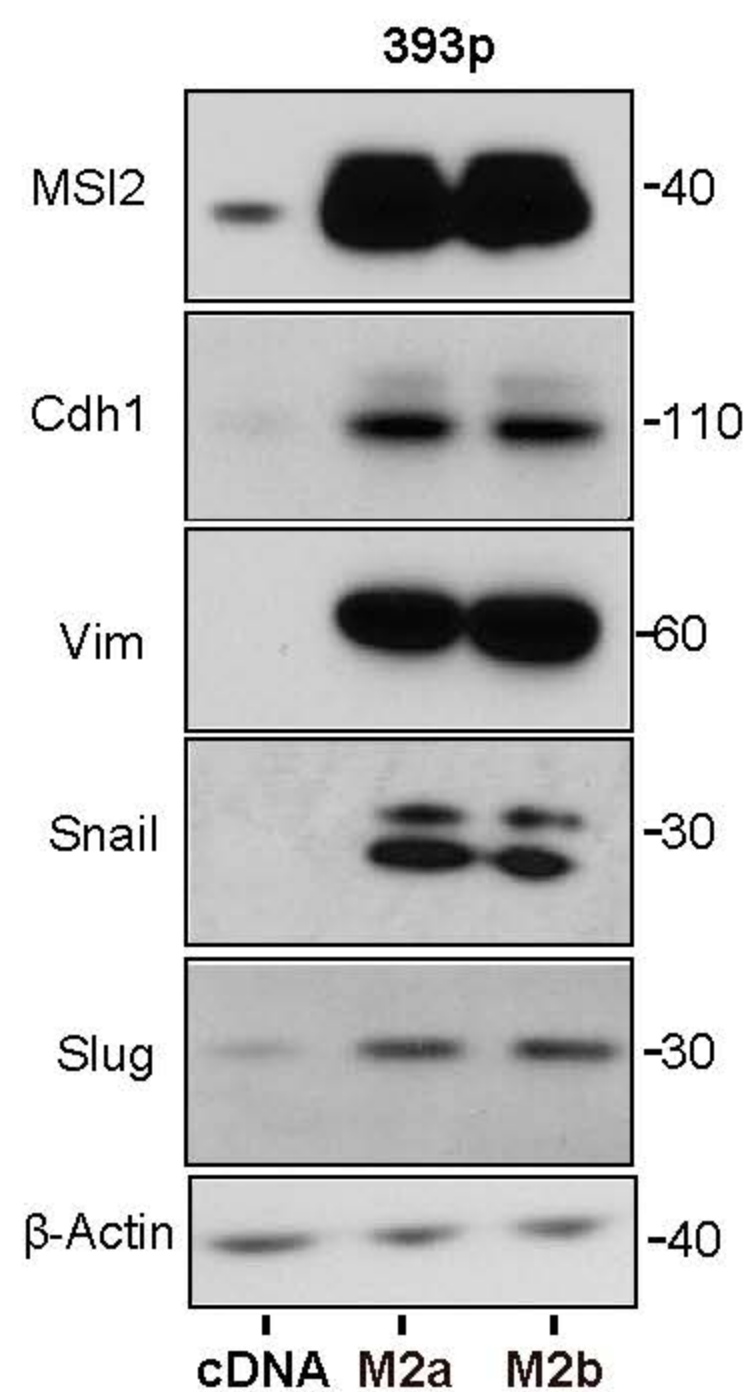**D**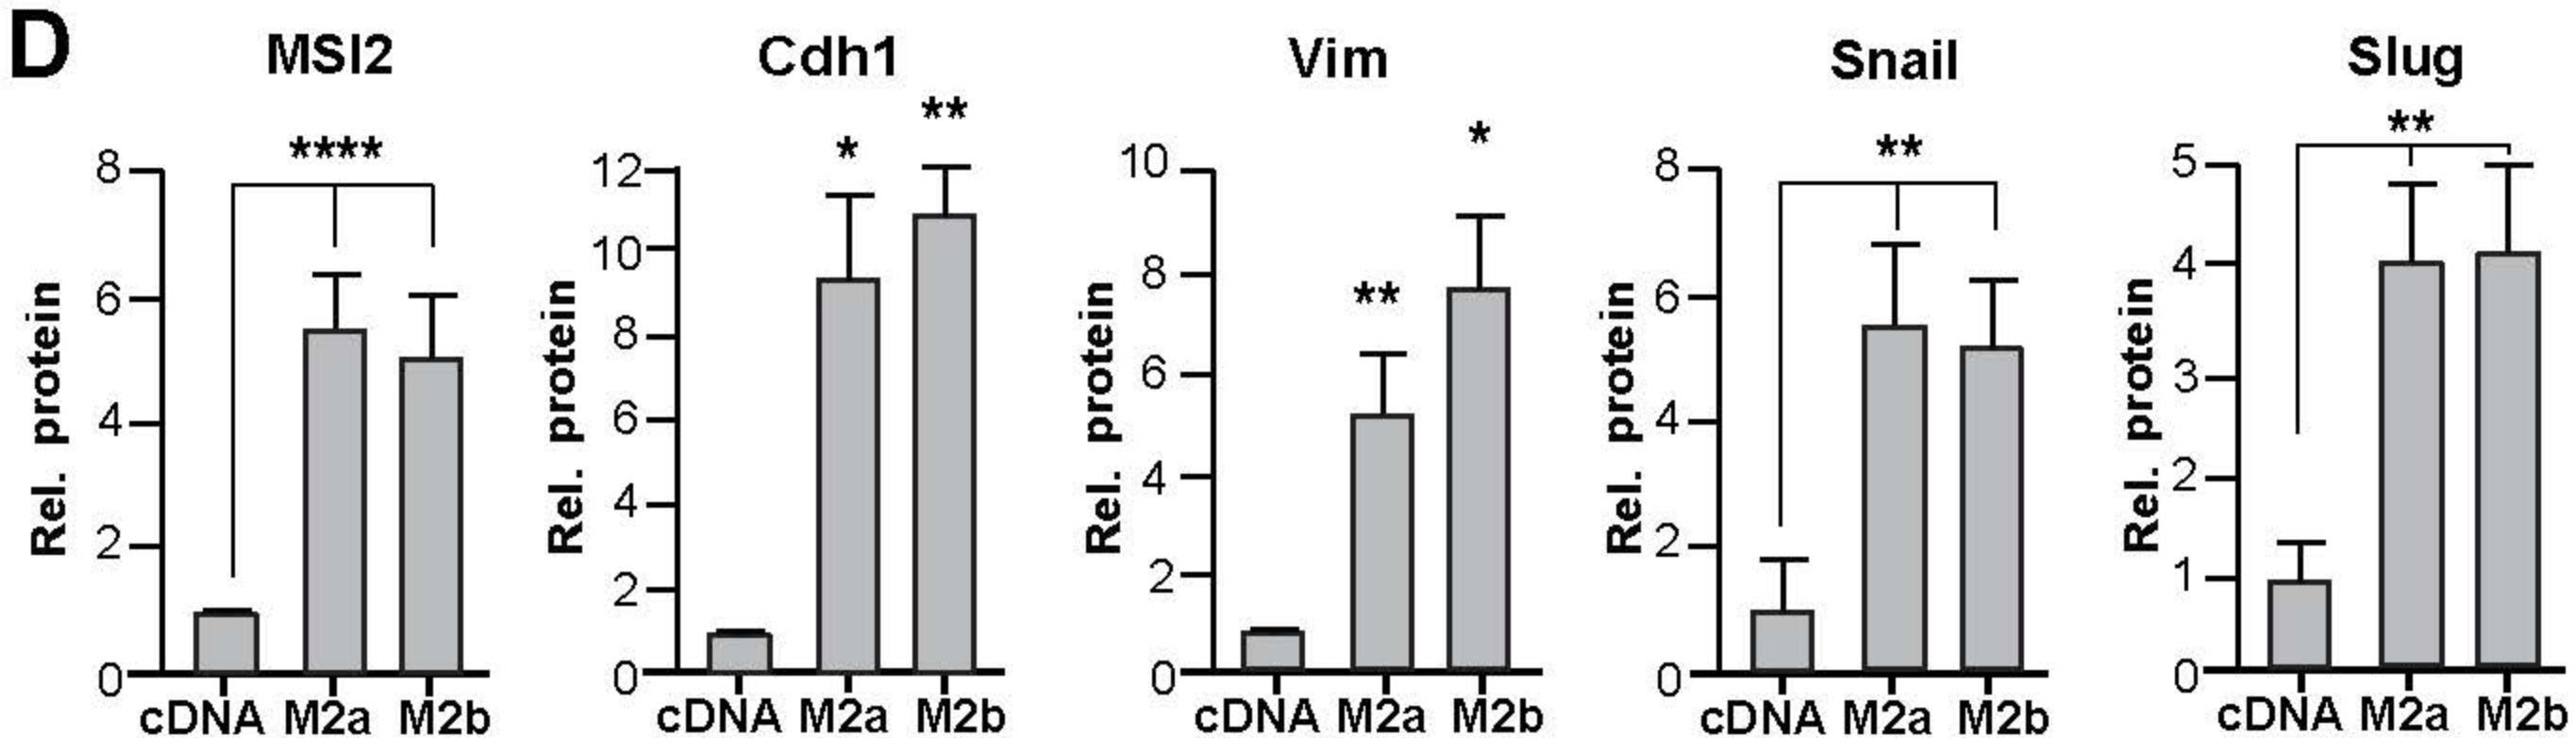



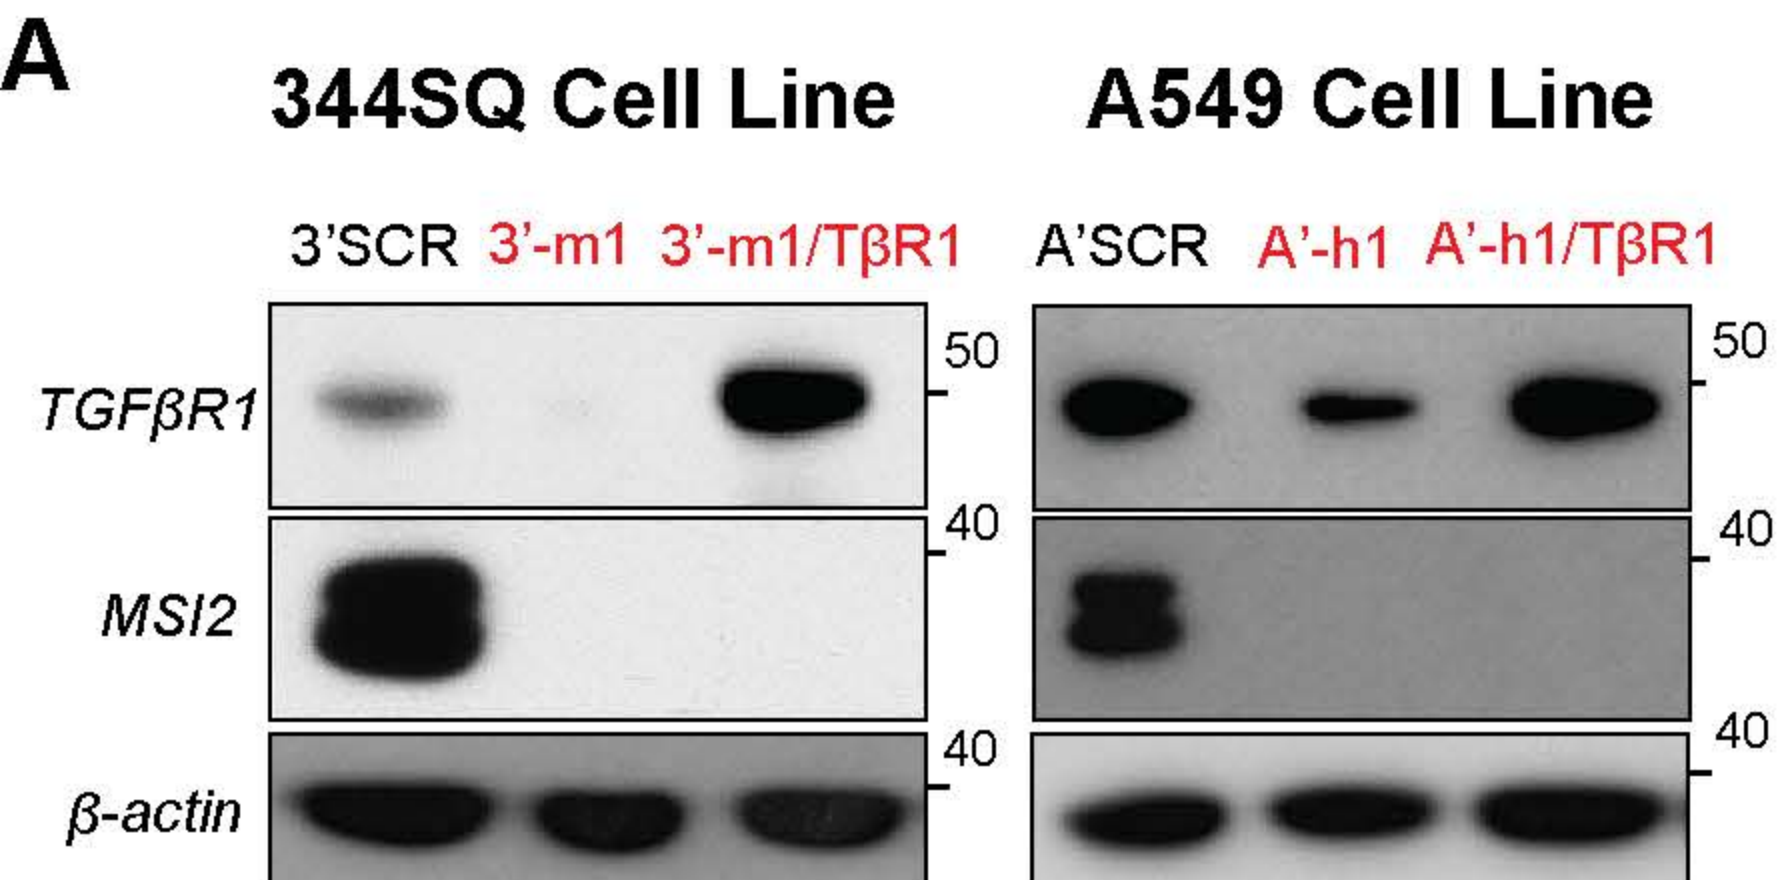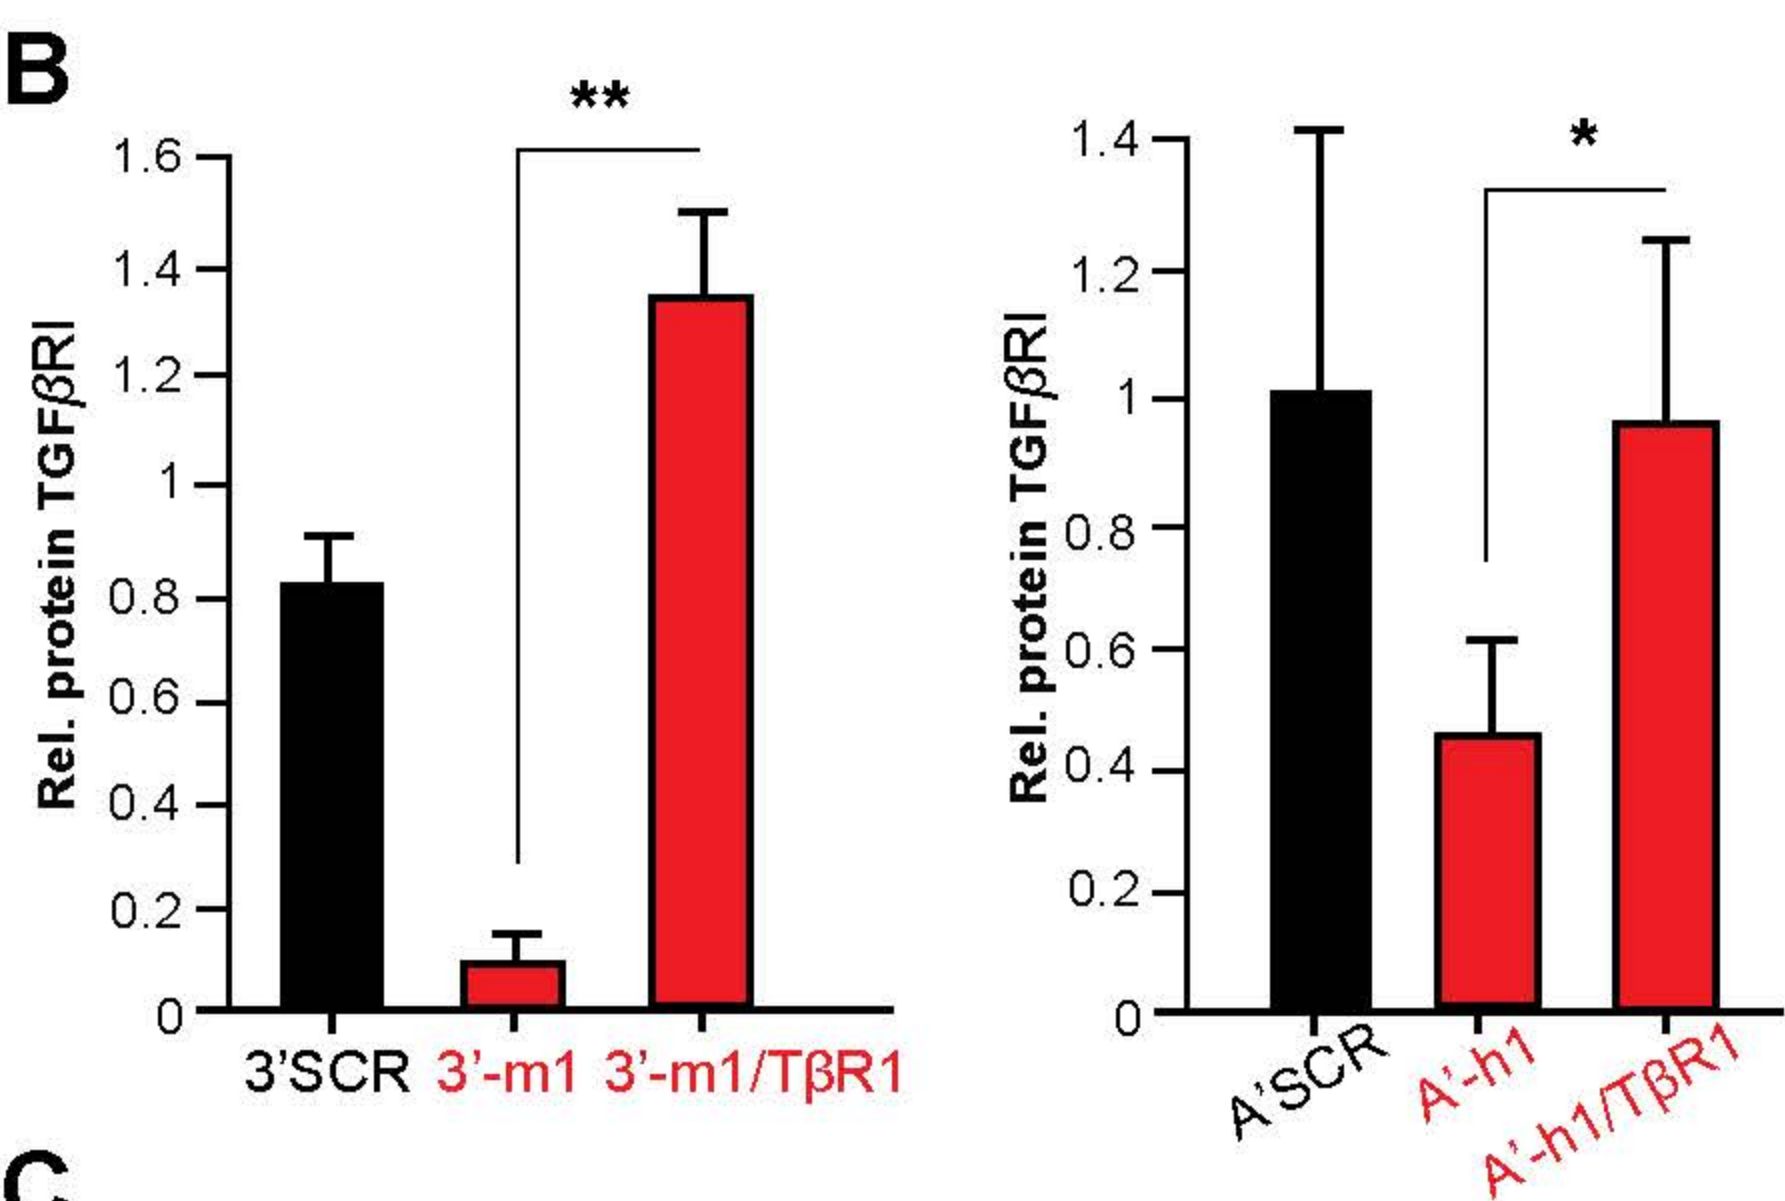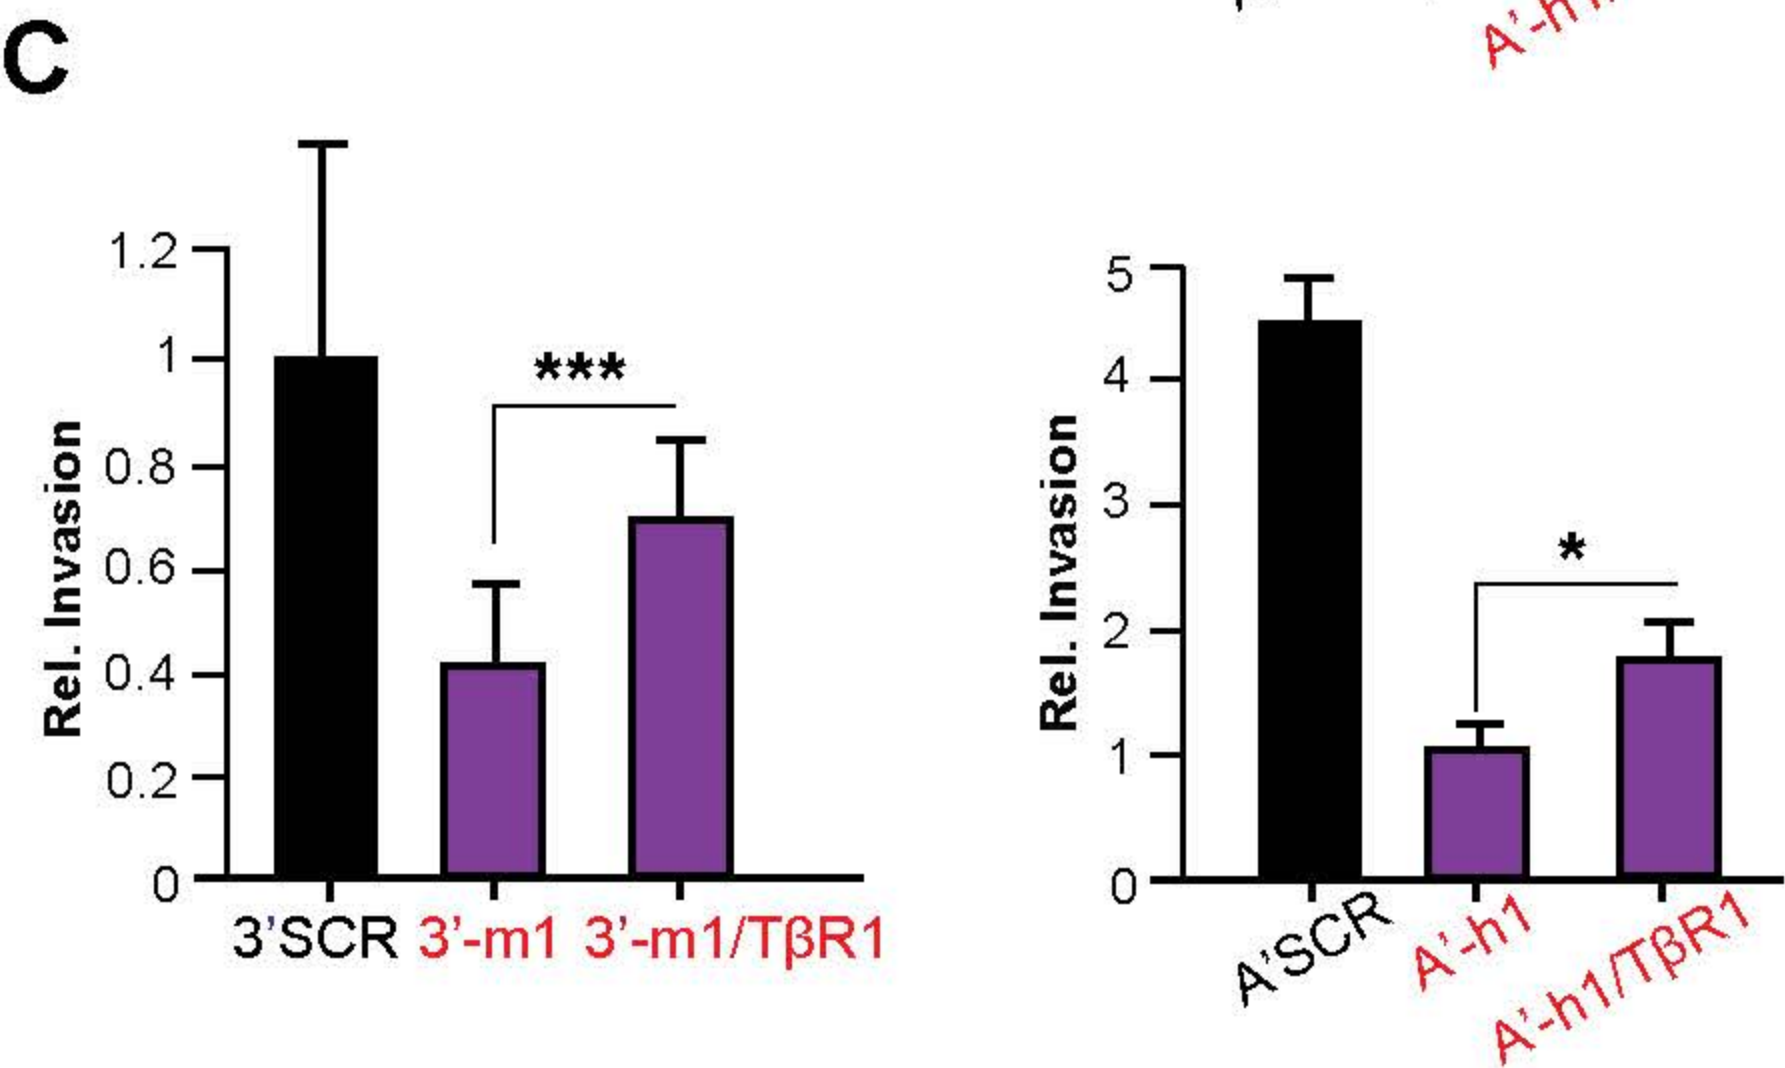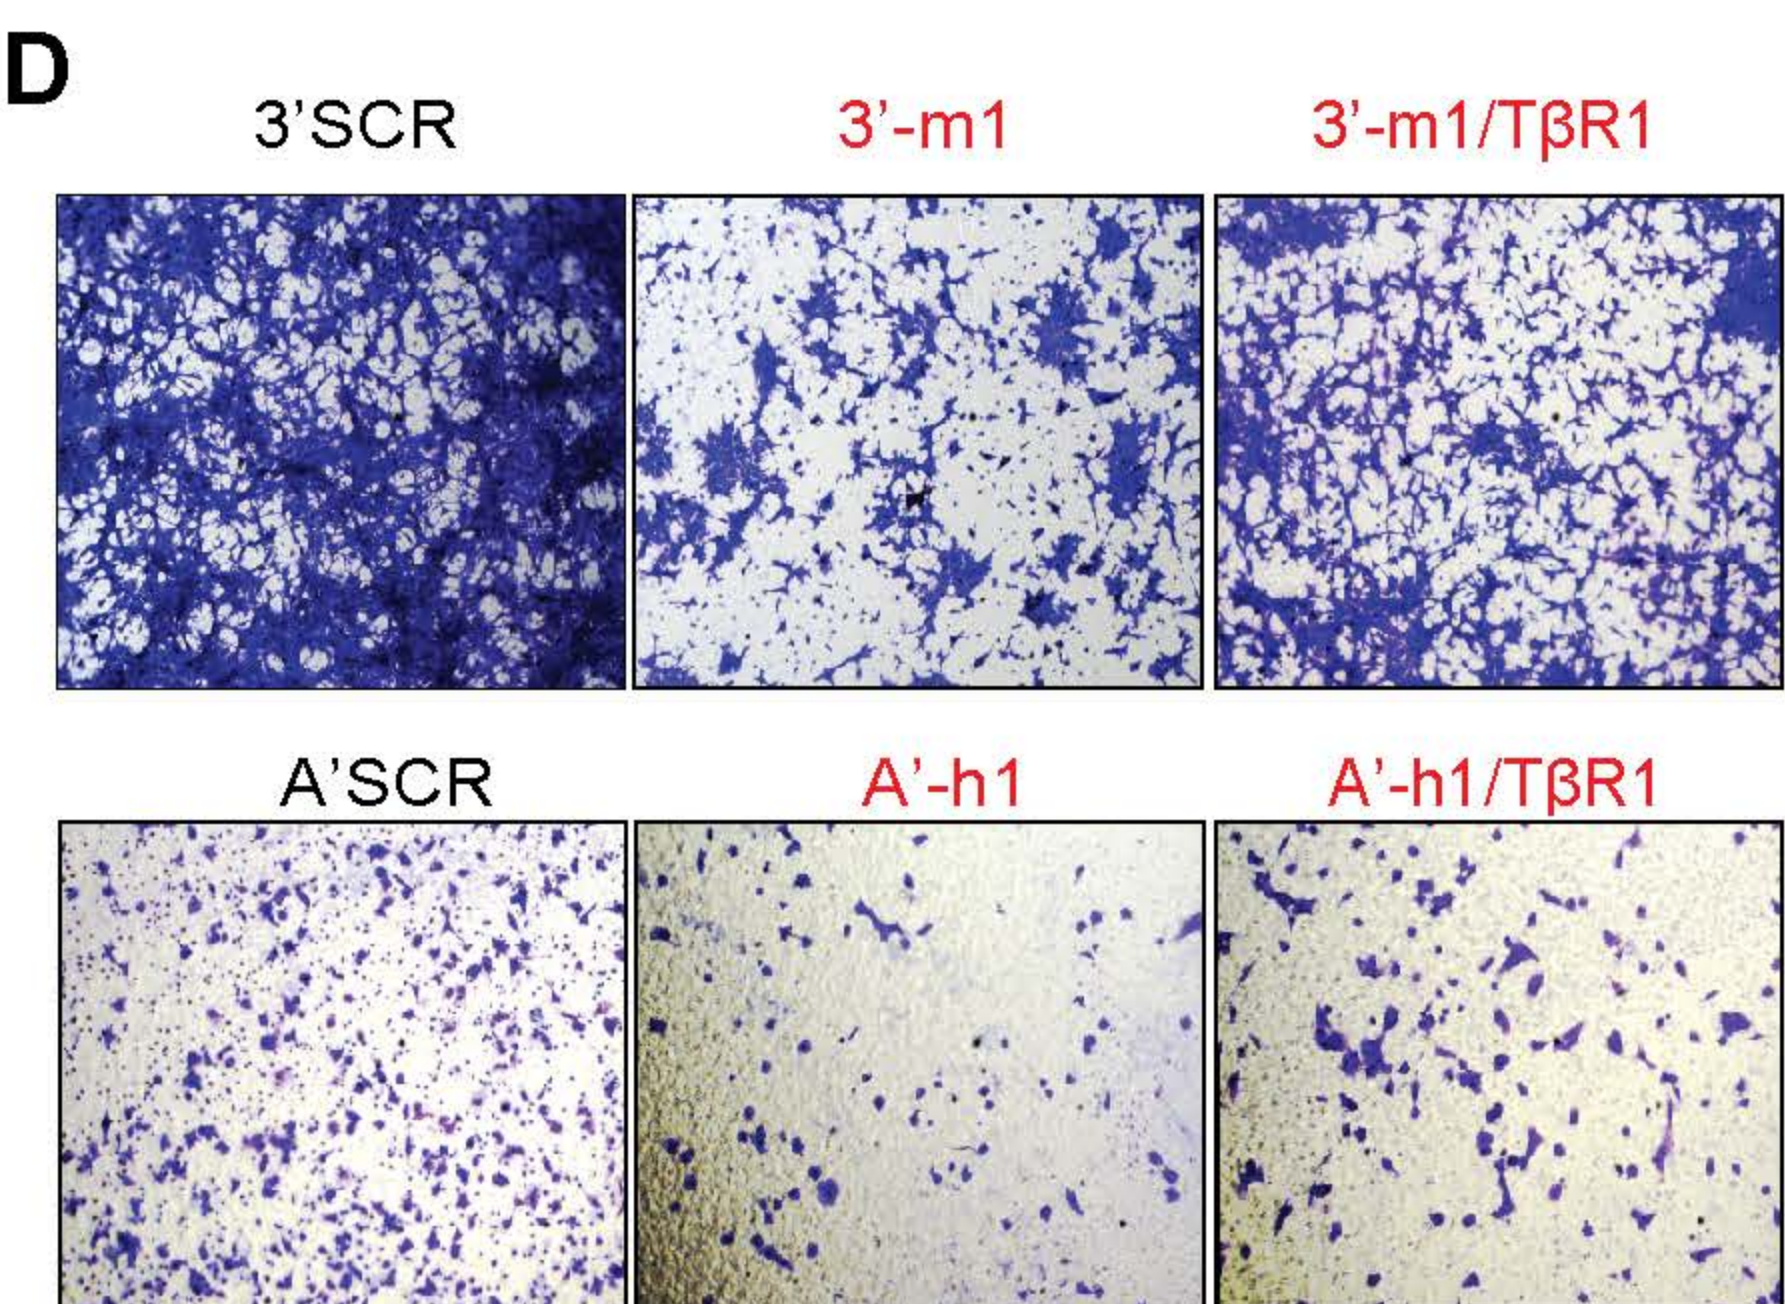



**A****344SQ**TGFβR1 (T-)  
siRNA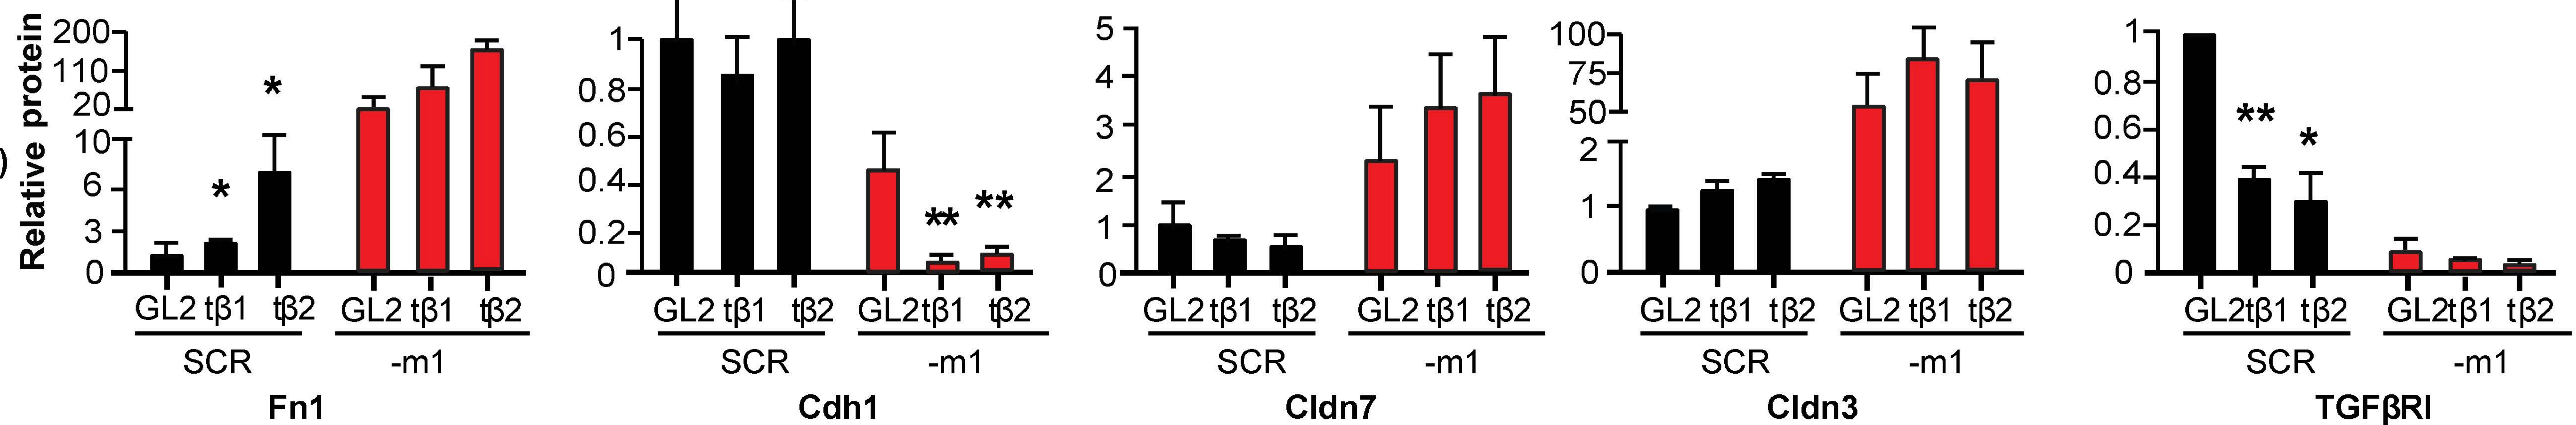**344SQ**SMAD3 (S-)  
siRNA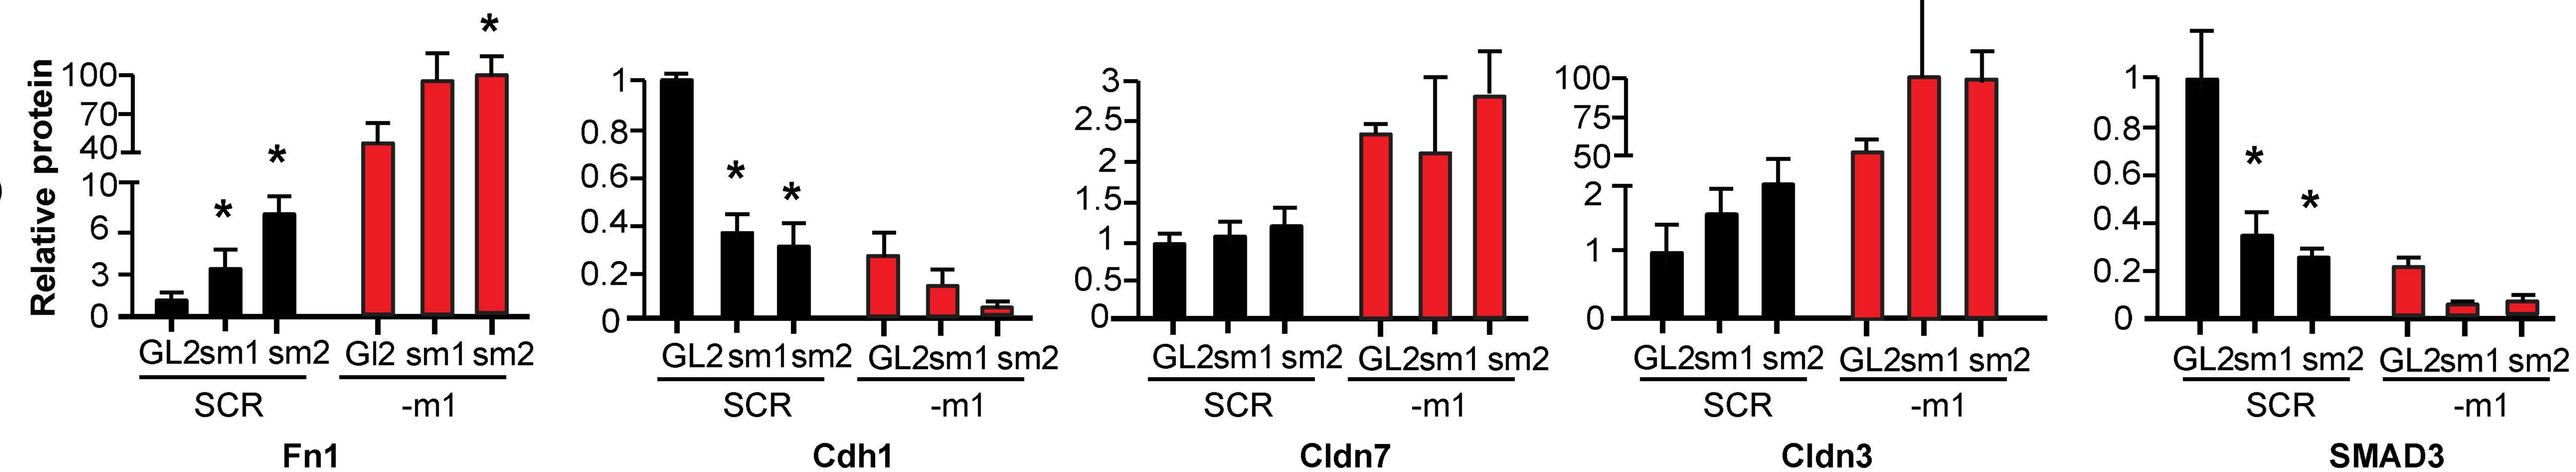**B****A549**TGFβR1 (T-)  
siRNA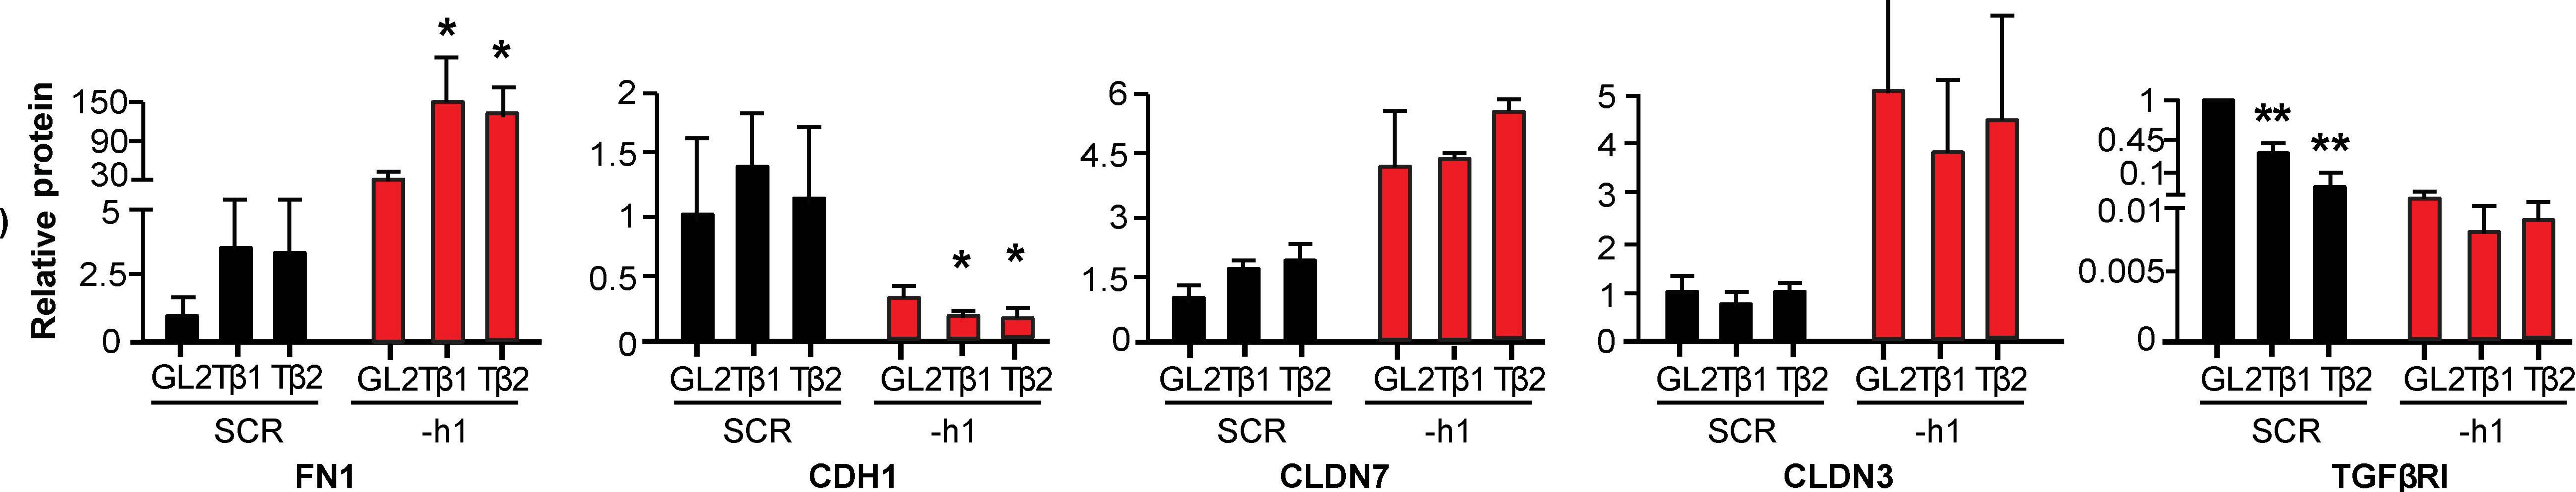**A549**SMAD3 (S-)  
siRNA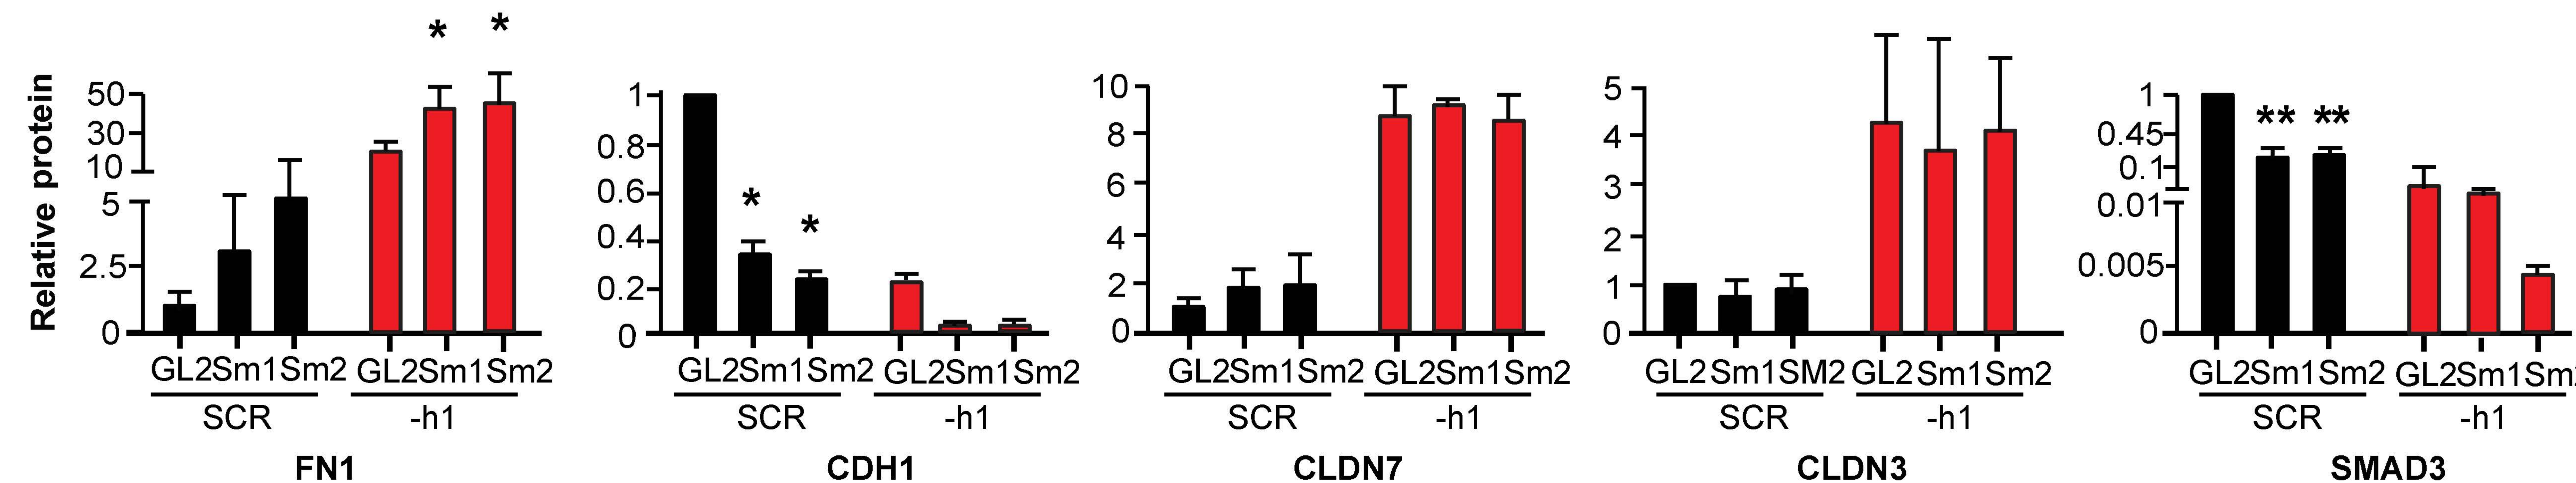



**Table S1. Primers used in RT-QPCR analysis.**

|              | Taqman assays from Life Technologies | Taqman assays designed with Primer Express                                             | SYBR Green assays designed with Primer Express           |
|--------------|--------------------------------------|----------------------------------------------------------------------------------------|----------------------------------------------------------|
| <b>Mouse</b> |                                      |                                                                                        |                                                          |
| Msi2         |                                      |                                                                                        | F:AGCAGTATTTTCGAGCAGTTTGGCA<br>R:TGTGGAACATCAGCATCGCATCC |
| Fn1          | Mm01256744_m1                        |                                                                                        |                                                          |
| Cldn7        |                                      |                                                                                        | F: AGAGCACCGGCATGATGAG<br>R:GGCGACAAACATGGCTAAGAA        |
| Tgfb1        | Mm00436964_m1                        |                                                                                        |                                                          |
| Smad3        | Mm01170760_m1                        |                                                                                        |                                                          |
| Cldn3        | Mm00515499_s1                        |                                                                                        |                                                          |
| Cldn5        | Mm00727012_s1                        |                                                                                        |                                                          |
| Cdh1 (E-Cad) | Mm00486918_m1                        |                                                                                        |                                                          |
| Ppib         | Mm00478295_m1                        |                                                                                        |                                                          |
| <b>HUMAN</b> |                                      |                                                                                        |                                                          |
| MSI2         |                                      |                                                                                        | F:GGTCATGAGAGATCCCCTACG<br>R:TCTACACTTGCTGGGTCTGC        |
| FN1          |                                      | F:ATGCCGACCAGAAGTTTGG<br>R:AATGCGGTACATGACCCCTT<br>P:6fam-CCCCATGGCTGCCACGAG-bhq1      |                                                          |
| CLDN7        | Hs00600772_m1                        |                                                                                        |                                                          |
| TGFBR1       | Hs00610320_m1                        |                                                                                        |                                                          |
| SMAD3        | Hs00232222_m1                        |                                                                                        |                                                          |
| CLDN3        | Hs00265816_s1                        |                                                                                        |                                                          |
| CLDN5        |                                      |                                                                                        |                                                          |
| CDH1         | Hs00170423_m1                        |                                                                                        |                                                          |
| POLR2F       |                                      | F:TGCCATGAAGGAACTCAAGG<br>R:TCATAGCTCCCATCTGGCAG<br>P:6fam-CCCCATCATCATTGCCGTTACC-bhq1 |                                                          |

F, forward; R, reverse; P, probe.

**Table S2. Patient characteristics for the primary NSCLC tumors arrayed in tissue microarray (TMA).**

|                                         |      |
|-----------------------------------------|------|
| <b>Gender</b>                           |      |
| Male                                    | 48%  |
| Female                                  | 52%  |
| <b>Age at diagnosis</b>                 |      |
| Mean                                    | 66.0 |
| Min                                     | 41.0 |
| Max                                     | 83.0 |
| SD                                      | 9.1  |
| <b>Histology</b>                        |      |
|                                         | %    |
| Acinar cell carcinoma                   | 12.0 |
| Squamous cell carcinoma, NOS            | 23.0 |
| Adenocarcinoma, NOS                     | 44.0 |
| Non-small cell carcinoma                | 4.0  |
| Bronchiolo-alveolar adenocarcinoma, NOS | 7.0  |
| Papillary adenocarcinoma, NOS           | 4.0  |
| Adenosquamous carcinoma                 | 6.0  |
| <b>Overall stage</b>                    |      |
|                                         | %    |
| 1A                                      | 7    |
| 1B                                      | 12   |
| 2B                                      | 2    |
| 3A                                      | 55   |
| 3B                                      | 13   |
| 4                                       | 12   |
| <b>T stage</b>                          |      |
|                                         | %    |
| 1                                       | 19   |
| 2                                       | 53   |
| 3                                       | 13   |
| 4                                       | 15   |
| <b>Lymph nodes</b>                      |      |
|                                         | %    |
| 0                                       | 22   |
| X                                       | 78   |
| <b>M stage</b>                          |      |
|                                         | %    |
| 0                                       | 88   |
| X                                       | 12   |
| <b>Grade</b>                            |      |
|                                         | %    |
| Well differentiated                     | 2.3  |
| Moderately differentiated               | 46.6 |
| Poor differentiated                     | 48.8 |
| Undifferentiated                        | 2.4  |

TMAs contained specimens from 123 patients with characteristics noted in the table and for 22 normal lungs

**Table S3. Patient characteristics for the analyzed grouped NSCLC samples (normal, primary tumor and lymph node metastasis).**

**Normal-Lung Cancer-Metastatic Matched Cases**

| Patient | Age at DOS | M/F | Diagnosis                                                                                        | Grade                       | Stage (pathologic) | Type of Metastasis |
|---------|------------|-----|--------------------------------------------------------------------------------------------------|-----------------------------|--------------------|--------------------|
| 001     | 46         | M   | adenocarcinoma (mucinous features)                                                               | G2                          | T1 N1 MX (IIA)     | Lymph node         |
| 002     | 64         | F   | adenocarcinoma                                                                                   | G2                          | T2 N1 MX (IIB)     | Lymph node         |
| 003     | 68         | F   | adenocarcinoma                                                                                   | G3                          | T0 N2 MX (IIIA)    | Lymph node         |
| 004     | 63         | M   | adenocarcinoma (conventional)                                                                    | G2                          | T1a N1 MX (IIA)    | Lymph node         |
| 005     | 64         | M   | adenocarcinoma (mixed: mucinous 80%, fetal 10%, acinar 5%, solid 5%)                             | G2                          | T2a N2 MX (IIIA)   | Lymph node         |
| 006     | 73         | M   | adenocarcinoma                                                                                   | G2                          | T2a N1 MX (IIB)    | Lymph node         |
| 007     | 70         | F   | invasive squamous cell with focal adenocarcinoma (nodal mets appear squamous in differentiation) | G2                          | T4 N2 MX (IIIB)    | Lymph node         |
| 008     | 78         | F   | squamous cell carcinoma                                                                          | G2                          | T3 N1 MX (IIIA)    | Lymph node         |
| 009     | 54         | M   | squamous cell (keratinizing) carcinoma                                                           | G2                          | T2a N1 MX (IIB)    | Lymph node         |
| 010     | 73         | F   | adenocarcinoma                                                                                   | G2-3 (Moderately to poorly) | T1a N2 MX (IIIA)   | Lymph node         |
| 011     | 61         | F   | squamous cell carcinoma (minor component of glandular differentiation <5%)                       | G2                          | T1b N1 MX (IIA)    | Lymph node         |
| 012     | 52         | F   | adenocarcinoma (predominantly solid pattern)                                                     | G3                          | T2a N1 MX (IIB)    | Lymph node         |
| 013     | 65         | M   | adenocarcinoma                                                                                   | G3                          | T2N2MX             | Lymph node         |
| 014     | 55         | F   | squamous cell carcinoma                                                                          | G3                          | T1N2MX (IIIA)      | Lymph node         |

**Table S4. Sequences of siRNA mixtures and shRNA used in gene knockdowns.**

| LP_4873         |      |                           |                       |                                 |         |                |           |                                                 |
|-----------------|------|---------------------------|-----------------------|---------------------------------|---------|----------------|-----------|-------------------------------------------------|
| G-CUSTOM-117757 |      |                           |                       |                                 |         |                |           |                                                 |
| Supplier        | Well | Pool Catalog Number       | Duplex Catalog Number | Gene Symbol                     | GENE ID | Gene Accession | GI Number | Sequence                                        |
| Dharmacon       | B02  | J-003929-09               | J-003929-09           | Human TGFBR1 "Tβ1" (Mixture 1)  | 7046    | NM_004612      | 66346739  | GAGAAGAACGUUCGUGGUU and UGCGAGAACUAUUGUGUUA     |
| Dharmacon       | B04  | J-003929-11               | J-003929-11           | Human TGFBR1 "Tβ2" (Mixture 2)  | 7046    | NM_004612      | 66346739  | GACCACAGACAAAGUUAUA and CGAGAUAGGCCGUUUGUAU     |
| Dharmacon       | B07  | J-040617-05               | J-040617-05           | Mouse Tgfbr1 "tβ1" (Mixture 1)  | 21812   | NM_009370      | 40254607  | GGGCAGUUACUACAACAUA and CUAGAUCGCCCUUUCAUUU     |
| Dharmacon       | B09  | J-040617-07               | J-040617-07           | Mouse Tgfbr1 "tβ2" (Mixture 2)  | 21812   | NM_009370      | 40254607  | GCGAAGGCAUUACAGUGUU and UGACAGCUUUGCGAAUUA      |
| Dharmacon       | C02  | J-020067-05               | J-020067-05           | Human SMAD3 "Sm1" (Mixture 1)   | 4088    | NM_005902      | 52352808  | CAACAGGAAUGCAGCAGUG and GAGUUCGCCUUCAAUAUGA     |
| Dharmacon       | C04  | J-020067-07               | J-020067-07           | Human SMAD3 "Sm2" (Mixture 2)   | 4088    | NM_005902      | 52352808  | GGACGCAGGUUCUCCAAAC and UUAGAGACAUCAAGUAUGG     |
| Dharmacon       | C07  | J-040706-05               | J-040706-05           | Mouse Smad3 "sm1" (Mixture 1)   | 17127   | NM_016769      | 31543221  | GAACUUACAAGGCGACACA and GGACGCAGGUUCUCCAAAC     |
| Dharmacon       | C09  | J-040706-07               | J-040706-07           | Mouse Smad3 "sm2" (Mixture 2)   | 17127   | NM_016769      | 31543221  | CCAUGGAGCUCUGUGAGUU and GGAUUGAGCUACACCUGAA     |
| Dharmacon       | =D07 | J-060672-09               | J-060672-09           | Mouse Cldn7 "Cl7-1" (Mixture 1) | 53624   | NM_016887      | 31560439  | CCAUGAACGUUAAGUACGA and GGGAGAUGACAAAGCGAAG     |
| Dharmacon       | D09  | J-060672-11               | J-060672-11           | Mouse Cldn7 "Cl7-2" (Mixture 2) | 53624   | NM_016887      | 31560439  | CCGAAUAGCUAUGACUGGA and CUGGAUUGGUCAUCAGAUU     |
| Qiagen          |      | SI04236652 and SI04285834 |                       | Human MSI2 "-ih1" (Mixture 2)   | 124540  |                | 31560439  | ATGAGAGATCCCACTACGAAA and CUGGAUUGGUCAUCAGAUU   |
| Qiagen          |      | SI04312665 and SI04375847 |                       | Human MSI2 "-h2" (Mixture 1)    | 124540  |                | 31560439  | TCCCAACTTCGTGGCGACCTA and CCAGATAGCCTTAGAGACTAT |
| Qiagen          |      | SI04465426 and SI04958079 |                       | Mouse Msi2 "-m1" (Mixture 2)    | 76626   |                | 31560439  | TTCCAAGACGATTGACCCAAA and GCAAGTGTAGATAAAGTATTA |
| Qiagen          |      | SI04958086 and SI04958093 |                       | Mouse Msi2 "-m2" (Mixture 1)    | 76626   |                | 31560439  | ATGAGAGATCCCAACGAAA and CCAGATAGCCTTAGAGACTAT   |



### ***shRNA Targeting Sequences***

Mouse Msi2-m1: CCGGCCCAACTTTGTGGCAACCTATCTCGAGATAGGTTGCCACAAAGTTGGGTTTTTG

Mouse Msi2-m2: CCGGCGTAGGAGGATTGTCTGCAAACCTCGAGTTTGCAGACAATCCTCCTACGTTTTTG

Human MSI2-h1: CCGGGTGAAGATGTAAAGCAATATCTCGAGATATTGCTTTACATCTTCCACTTTTTG

Human MSI2-h2: CCGGCCCAACTTCGTGGCGACCTATCTCGAGATAGGTCGCCACGAAGTTGGGTTTTTG

### ***cDNA ORF Sequences used for rescue experiments***

Human CLDN7:

ATGGCCAATTCGGGCCTGCAGTTGCTGGGCTTCTCCATGGCCCTGCTGGGCTGGGTGGGTCTGGTGGCCTGCACCGCCATCCCGCAGTGGCAGATGAGCTCCTATGCGGGT  
GACAACATCATCACGGCCCAGGCCATGTACAAGGGGCTGTGGATGGACTGCGTCACGCAGAGCACGGGGATGATGAGCTGCAAAATGTACGACTCGGTGCTCGCCCTGTCCG  
CGGCCTTGCAGGCCACTCGAGCCCTAATGGTGGTCTCCCTGGTGTGGGCTTCTGCCATGTTTTGTGGCCACGATGGGCATGAAGTGCACGCGCTGTGGGGGAGACGACA  
AAGTGAAGAAGGCCCGTATAGCCATGGGTGGAGGCATAATTTTCATCGTGGCAGGCTTGCCACCTTGGTAGCTTGTCTCTGGTATGGCCATCAGATTGTCACAGACTTTTATA  
ACCCTTTGATCCCTACCAACATTAAGTATGAGTTTGGCCCTGCCATCTTTATTGGCTGGGCAGGGTCTGCCCTAGTCATCTGCGGAGGTGCACCTGCTCCTGTTCTGTCTG  
GGAATGAGAGCAAGGCTGGGTACCGTGCACCCCGCTTTACCCCTAAGTCCAACCTTCCAAGGAGTATGTG

Human TGF $\beta$ R1:

ATGGAGGCGGCGGTCGCTGCTCCGCGTCCCCGGCTGCTCCTCCTCGTGTGGCGGCGGCGGCGGCGGCGGCGGCGGCGGCGGCGGCTGCTCCCGGGGGCGACGGCGTTACAGTGTTTCTGCCA  
CCTCTGTACAAAAGACAATTTTACTTGTGTGACAGATGGGCTCTGCTTTGTCTCTGTACAGAGACCACAGACAAAGTTATACACAACAGCATGTGTATAGCTGAAATTGACTTAATCCTCG  
AGATAGGCCGTTTGTATGTGCACCCCTTTCAAAAAGTGGGTCTGTGACTACAACATATTGCTGCAATCAGGACCATTGCAATAAAATAGAAGTTCCTCAACTACTGTAAAGTCAACCTGGC  
CTTGGTCTGTGGAAGTGGCAGCTGTCTATTGCTGGACCAAGTGTGCTTCTGTGCTGCTCACTCATGTTGATGGTCTATATCTGCCACAACCGCACTGTCAATCACCATCGAGTGC  
CAATGAAGAGGACCCCTCATTAGATCGCCCTTTTATTTACAGAGGGTACTACGTTGAAAGACTTAATTTATGATATGACAACGTGAGTCTGGCTCAGGTTTACCATTGCTTGTTCAGAGAA  
CAATTGCAGAACTATTGTGTTACAAGAAAAGCATTGGCAAAGTTCGATTTGGAGAAAGTTGGAGAGGAAAGTGGCGGGGAGAAGAAGTTGCTGTTAAGATATTCTCCTCTAGAGAAGAAGC  
TTCGTGGTCCGTGAGGCAGAGATTTATCAAACCTGTAATGTTACGTCATGAAAACATCCTGGGATTTATAGCAGCAGACAATAAAAGACAATGGTACTTGGACTCAGCTCTGGTTGGTGTGAG  
ATTATCATGAGCATGGATCCCTTTTGTACTTAAACAGATACACAGTACTGTGGAAGGAATGATAAACTTGTCTGTCCACGGCGAGCGGTCTTGGCCATCTTCAATGGAGATTGTT  
GGTACCCAAGGAAAGCCAGCCATTGCTCATAGAGATTTGAAATCAAAGAATATCTTGGTAAAGAAGAATGGAACCTTGTGTATTGCAGACTTAGGACTGGCAGTAAGACATGATTCAGCCA  
CAGATACCATTTGATATTGCTCAAACACAGAGTGGGAACAAAAGGTACATGGCCCTGAAGTTCTCGATGATTCCATAAATATGAAACATTTTGAATCCTTCAAACGTGCTGACATCTAT  
GCAATGGGCTTAGTATTCTGGGAAATGCTCGACGATGTTCCATTGGTGGAAATTCATGAAGATTACCAACTGCCTTATTATGATCTTGTACCTTCTGACCCATCAGTTGAAGAAATGAG  
AAAAGTTGTTTGTGAACAGAAGTTAAGGCCAAATATCCCAAACAGATGGCAGAGCTGTGAAGCCTTGAGAGTAATGGCTAAAATATGAGAGAATGTTGGTATGCCAATGGAGCAGC  
TAGGCTTACAGCATTGCGGATTAAGAAAACATTATCGCAAACCTCAGTCAACAGGAAGGCATCAAATG

**Table S5. Antibodies used for RPPA analysis.**

| Ab Name               | Gene Name         | Company        | Catalog #   | Ab ID   | Species | Validation Status* |
|-----------------------|-------------------|----------------|-------------|---------|---------|--------------------|
| 14-3-3_beta           | YWHAH             | Santa Cruz     | sc-628      | 882.    | Rabbit  | Validated          |
| 14-3-3_epsilon        | YWHAH             | Santa Cruz     | sc-23957    | 913.1   | Mouse   | Use with Caution   |
| 14-3-3_zeta           | YWHAZ             | Santa Cruz     | sc-1019     | 883.    | Rabbit  | Validated          |
| 4E-BP1                | EIF4EBP1          | CST            | 9452        | 2.8     | Rabbit  | Validated          |
| 4E-BP1_pS65           | EIF4EBP1          | CST            | 9456        | 3.1     | Rabbit  | Validated          |
| 4E-BP1_pT37_T46       | EIF4EBP1          | CST            | 9459        | 6.4     | Rabbit  | Validated          |
| 53BP1                 | TP53BP1           | CST            | 4937        | 985.1   | Rabbit  | Validated          |
| ACC_pS79              | ACACA<br>ACACB    | CST            | 3661        | 13.4    | Rabbit  | Validated          |
| ACC1                  | ACACA             | Epitomics      | 1768-1      | 14.1    | Rabbit  | Under evaluation   |
| ACVRL1                | ACVRL1            | Epitomics      | 2940-1      | 1086.10 | Rabbit  | Use with Caution   |
| Akt                   | AKT1<br>AKT2 AKT3 | CST            | 4691        | 1084.11 | Rabbit  | Validated          |
| Akt_pS473             | AKT1<br>AKT2 AKT3 | CST            | 9271        | 23.10   | Rabbit  | Validated          |
| Akt_pT308             | AKT1<br>AKT2 AKT3 | CST            | 2965        | 1154    | Rabbit  | Validated          |
| AMPK_alpha            | PRKAA1            | CST            | 2532        | 39.4    | Rabbit  | Use with Caution   |
| AMPK_pT172            | PRKAA1            | CST            | 2535        | 40.6    | Rabbit  | Validated          |
| Annexin_VII           | ANXA7             | BD Biosciences | 610668      | 1142.1  | Mouse   | Validated          |
| AR                    | AR                | Epitomics      | 1852-1      | 756.1   | Rabbit  | Validated          |
| Bad_pS112             | BAD               | CST            | 9291        | 63.7    | Rabbit  | Validated          |
| Bak                   | BAK1              | Epitomics      | 1542-1      | 71.2    | Rabbit  | Use with Caution   |
| Bax                   | BAX               | CST            | 2772        | 73.5    | Rabbit  | Validated          |
| Bcl-2                 | BCL2              | Dako           | Dako M0887  | 80.1    | Mouse   | Validated          |
| Bcl-xL                | BCL2L1            | CST            | 2762        | 85.5    | Rabbit  | Validated          |
| Beclin                | BECN1             | Santa Cruz     | sc-10086    | 87.1    | Goat    | Use with Caution   |
| beta-Catenin          | CTNNB1            | CST            | 9562        | 75.3    | Rabbit  | Validated          |
| Bid                   | BID               | Epitomics      | 1008-1      | 88.1    | Rabbit  | Use with Caution   |
| Bim                   | BCL2L11           | Epitomics      | 1036-1      | 90.1    | Rabbit  | Validated          |
| B-Raf                 | BRAF              | Santa Cruz     | sc-5284     | 96.2    | Mouse   | Use with Caution   |
| BRCA2                 | BRCA2             | CST            | 9012        | 761.1   | Rabbit  | Use with Caution   |
| Caspase-7_cleavedD198 | CASP7             | CST            | 9491        | 109.6   | Rabbit  | Use with Caution   |
| Caveolin-1            | CAV1              | CST            | 3238        | 114.1   | Rabbit  | Validated          |
| CD31                  | PECAM1            | Dako           | M0823       | 127.1   | Mouse   | Validated          |
| CD49b                 | ITGA2             | BD Biosciences | 611016      | 937.1   | Mouse   | Validated          |
| CDK1                  | CDC2              | CST            | 9112        | 1007.5  | Rabbit  | Validated          |
| Chk1                  | CHEK1             | CST            | 2360        | 1203.3  | Mouse   | Use with caution   |
| Chk1_pS345            | CHEK1             | CST            | 2348        | 903.7   | Rabbit  | Use with caution   |
| Chk2                  | CHEK2             | CST            | 3440        | 146.1   | Mouse   | Validated          |
| Chk2_pT68             | CHEK2             | CST            | 2197        | 147.2   | Rabbit  | Use with Caution   |
| cIAP                  | BIRC2             | Millipore      | 07-759      | 930.1   | Rabbit  | Caution            |
| c-Jun_pS73            | JUN               | CST            | 9164        | 155.5   | Rabbit  | Validated          |
| c-Kit                 | KIT               | Epitomics      | 1522        | 157     | Rabbit  | Validated          |
| Claudin-7             | CLDN7             | Novus          | NB100-91714 | 852.1   | Rabbit  | Validated          |
| c-Met_pY1235          | MET               | CST            | 3129        | 727.5   | Rabbit  | Validated          |

|                         |                |                     |             |         |        |                                     |
|-------------------------|----------------|---------------------|-------------|---------|--------|-------------------------------------|
| c-Myc                   | MYC            | Santa Cruz          | sc-764      | 1143.1  | Rabbit | Use with Caution                    |
| Collagen_VI             | COL6A1         | Santa Cruz          | SC-20649    | 171.1   | Rabbit | Validated                           |
| C-Raf                   | RAF1           | Millipore           | 05-739      | 803     | Rabbit | Validated                           |
| C-Raf_pS338             | RAF1           | CST                 | 9427        | 179.4   | Rabbit | Validated                           |
| Cyclin_B1               | CCNB1          | Epitomics           | 1495-1      | 192.1   | Rabbit | Validated                           |
| Cyclin_D1               | CCND1          | Santa Cruz          | SC-718      | 194.1   | Rabbit | Validated                           |
| Cyclin_E1               | CCNE1          | Santa Cruz          | SC-247      | 201.1   | Mouse  | Validated                           |
| DJ-1                    | PARK7          | Abcam               | ab76008     | 891.1   | Rabbit | Validated                           |
| Dvl3                    | DVL3           | CST                 | 3218        | 940.1   | Rabbit | Validated                           |
| E-Cadherin              | CDH1           | CST                 | 3195        | 1099.10 | Rabbit | Validated                           |
| eEF2                    | EEF2           | CST                 | 2332        | 1060.3  | Rabbit | Use with Caution                    |
| eEF2K                   | EEF2K          | CST                 | 3692        | 1061.2  | Rabbit | Validated                           |
| EGFR                    | EGFR           | CST                 | 2232        | 1120.15 | Rabbit | Validated                           |
| EGFR_pY1068             | EGFR           | CST                 | 2234        | 217.13  | Rabbit | Use with caution; also sees pHer2   |
| EGFR_pY1173             | EGFR           | Epitomics           | 1124        | 221.3   | Rabbit | Validated                           |
| eIF4E                   | EIF4E          | CST                 | 9742        | 722.3   | Rabbit | Validated                           |
| eIF4G                   | EIF4G1         | CST                 | 2498        | 1124.3  | Rabbit | Use with Caution                    |
| ER-alpha                | ESR1           | Lab Vision          | RM-9101-S   | 238.6   | Rabbit | Validated                           |
| ER-alpha_pS118          | ESR1           | Epitomics           | 1091-1      | 241.1   | Rabbit | Validated                           |
| FASN                    | FASN           | Cell Signaling      | 3180        | 1156.00 | Rabbit | Validated                           |
| Fibronectin             | FN1            | Epitomics           | 1574-1      | 262.1   | Rabbit | Validated                           |
| FOXO3a                  | FOXO3          | CST                 | 2497        | 1122.6  | Rabbit | Use with Caution                    |
| FOXO3a_pS318_S321       | FOXO3          | CST                 | 9465        | 270.1   | Rabbit | Use with Caution                    |
| FoxM1                   | FOXO1          | CST                 | 5436        | 1123.1  | Rabbit | Validated                           |
| G6PD                    | G6PD           | Santa Cruz          | sc-373887   | 1155    | Mouse  | Validated                           |
| Gab2                    | GAB2           | CST                 | 3239        | 943.1   | Rabbit | Validated                           |
| GAPDH                   | GAPDH          | Ambion              | AM4300      | 274.11  | Mouse  | Caution                             |
| GATA3                   | GATA3          | BD Biosciences      | 558686      | 764.1   | Mouse  | Validated                           |
| GSK3_pS9                | GSK3A<br>GSK3B | CST                 | 9336        | 1082.12 | Rabbit | Validated                           |
| GSK3-alpha-beta         | GSK3A<br>GSK3B | Santa Cruz          | SC-7291     | 284.2   | Mouse  | Validated                           |
| GSK3-alpha-beta_pS21_S9 | GSK3A<br>GSK3B | CST                 | 9331        | 285.12  | Rabbit | Validated                           |
| HER2                    | ERBB2          | Lab Vision          | MS-325-P1   | 1038.2  | Mouse  | Validated                           |
| HER2_pY1248             | ERBB2          | R&D Systems         | AF1768      | 1075.1  | Rabbit | Use with caution; likely sees pEGFR |
| HER3                    | ERBB3          | Santa Cruz          | sc-285      | 911.1   | Rabbit | Validated                           |
| HER3_pY1289             | ERBB3          | CST                 | 4791        | 728.12  | Rabbit | Use with Caution                    |
| Heregulin               | NRG1           | CST                 | 2573        | 890.1   | Rabbit | Validated                           |
| IGFBP2                  | IGFBP2         | CST                 | 3922        | 335.1   | Rabbit | Validated                           |
| INPP4B                  | INPP4B         | CST                 | 4039        | 1065.1  | Rabbit | Validated                           |
| IRS1                    | IRS1           | Upstate (Millipore) | 06-248      | 802.1   | Rabbit | Validated                           |
| JNK_pT183_pY185         | MAPK8          | CST                 | 4668        | 888.5   | Rabbit | Validated                           |
| JNK2                    | MAPK9          | CST                 | 4672        | 380.1   | Rabbit | Use with Caution                    |
| Lck                     | LCK            | CST                 | 2752        | 397.2   | Rabbit | Validated                           |
| MAPK_pT202_Y204         | MAPK1<br>MAPK3 | CST                 | 4377        | 405.3   | Rabbit | Validated                           |
| MEK1                    | MAP2K1         | Epitomics           | 1235-1      | 417.1   | Rabbit | Validated                           |
| MEK1_pS217_S221         | MAP2K1         | CST                 | 9154        | 1076.3  | Rabbit | Validated                           |
| MIG-6                   | ERRF1          | Sigma               | WH0054206M1 | 1062.1  | Mouse  | Validated                           |
| mTOR                    | FRAP1          | CST                 | 2983        | 444.3   | Rabbit | Validated                           |
| mTOR_pS2448             | FRAP1          | CST                 | 2971        | 446.14  | Rabbit | Use with caution                    |
| MYH11                   | MYH11          | SDI / Novus         | 21370002    | 1139.1  | Rabbit | Validated                           |
| Myosin IIa pS1943       | MYH9           | CST                 | 5026        | 1160    | Rabbit | Validated                           |

|                      |                  |                     |             |                |        |                  |
|----------------------|------------------|---------------------|-------------|----------------|--------|------------------|
| N-Cadherin           | CDH2             | CST                 | 4061        | 452.1          | Rabbit | Validated        |
| NDRG1_pT346          | NDRG1            | CST                 | 3217        | 1126           | Rabbit | Validated        |
| NF2                  | NF2              | SDI                 | 2271.00.02  | 1046.1         | Rabbit | Use with Caution |
| NF-kB-p65_pS536      | NFKB1            | CST                 | 3033        | 457.4          | Rabbit | Use with Caution |
| Notch1               | NOTCH1           | CST                 | 3268        | 1064.1         | Rabbit | Validated        |
| N-Ras                | NRAS             | Santa Cruz          | sc-31       | 1136.1         | Mouse  | Validated        |
| p21                  | CDKN1A           | Santa Cruz          | SC-397      | 470.1          | Rabbit | Validated        |
| p27                  | CDKN1B           | Epitomics           | 1591-1      | 897.1          | Rabbit | Validated        |
| p27_pT157            | CDKN1B           | R&D                 | AF1555      | 842.1          | Rabbit | Use with Caution |
| p27_pT198            | CDKN1B           | Abcam               | ab64949     | 878.1          | Rabbit | Validated        |
| p38_MAPK             | MAPK14           | CST                 | 9212        | 478.10         | Rabbit | Validated        |
| p38_pT180_Y182       | MAPK14           | CST                 | 9211        | 479.15         | Rabbit | Validated        |
| p53                  | TP53             | CST                 | 9282        | 481.3          | Rabbit | Under evaluation |
| p70S6K               | RPS6KB1          | Epitomics           | 1494-1      | 493.1          | Rabbit | Validated        |
| p70S6K_pT389         | RPS6KB1          | CST                 | 9205        | 494.7          | Rabbit | Validated        |
| p90RSK               | RPS6KA1          | CST                 | 9347        | 759.5          | Rabbit | Caution          |
| p90RSK_pT359_S363    | RPS6KA1          | CST                 | 9344        | 770.2          | Rabbit | Use with Caution |
| Paxillin             | PXN              | Epitomics           | 1500-1      | 505.1          | Rabbit | Caution          |
| PCNA                 | PCNA             | Abcam               | ab29        | 511.1          | Mouse  | Caution          |
| PDCD4                | PDCD4            | Rockland            | 600-401-965 | 816.1          | Rabbit | Use with Caution |
| PDK1                 | PDK1             | CST                 | 3062        | 515.5          | Rabbit | Validated        |
| PDK1_pS241           | PDK1             | CST                 | 3061        | 516.7          | Rabbit | Validated        |
| PEA15                | PEA15            | CST                 | 2780        | 1017.2         | Rabbit | Validated        |
| PEA15_pS116          | PEA15            | Invitrogen          | 44-836G     | 1018.1         | Rabbit | Validated        |
| PI3K-p110-alpha      | PIK3CA           | CST                 | 4255        | 808.1          | Rabbit | Use with Caution |
| PI3K-p85             | PIK3R1           | Upstate (Millipore) | 06-195      | 523.3 or 523.4 | Rabbit | Validated        |
| PKC-alpha            | PRKCA            | Upstate (Millipore) | 05-154      | 529.1          | Mouse  | Validated        |
| PKC-alpha_pS657      | PRKCA            | Upstate (Millipore) | 06-822      | 530.2          | Rabbit | Use with caution |
| PKC-delta_pS664      | PRKCD            | Upstate (Millipore) | 07-875      | 932.1          | Rabbit | Validated        |
| PKC-pan_BetaII_pS660 | PKC              | CST                 | 9371        | 1137.          | Rabbit | Validated        |
| PR                   | PGR              | Epitomics           | 1483-1      | 549.1          | Rabbit | Validated        |
| PRAS40_pT246         | AKT1S1           | Biosource           | 441100G     | 739.1          | Rabbit | Validated        |
| PTEN                 | PTEN             | CST                 | 9552        | 566.3          | Rabbit | Validated        |
| Rab11                | RAB11A<br>RAB11B | CST                 | 3539        | 1083.3         | Rabbit | Under evaluation |
| Rab25                | RAB25            | CST                 | 4314        | 1150.1         | Rabbit | Validated        |
| Rad50                | RAD50            | Millipore           | 05-525      | 987.1          | mouse  | Validated        |
| Rad51                | RAD51            | Chem Biotech        | na 71       | 579.3          | Mouse  | Under evaluation |
| Raptor               | RPTOR            | CST                 | 2280        | 1128.8         | Rabbit | Validated        |
| Rb_pS807_S811        | RB1              | CST                 | 9308        | 557.9          | Rabbit | Validated        |
| RBM15                | RBM15            | SDI / Novus         | 21390002    | 1138.1         | Rabbit | Validated        |
| Rictor               | RICTOR           | CST                 | 2114        | 1129.4         | Rabbit | Use with Caution |
| Rictor_pT1135        | RICTOR           | CST                 | 3806        | 1130.4         | Rabbit | Validated        |
| S6_pS235_S236        | RPS6             | CST                 | 2211        | 600.8          | Rabbit | Validated        |
| S6_pS240_S244        | RPS6             | CST                 | 2215        | 601.4          | Rabbit | Validated        |
| SCD1                 | SCD1             | Santa Cruz          | sc-58420    | 1127.1         | Mouse  | Validated        |
| SF2                  | SFRS1            | Invitrogen          | 32-4500     | 1131.1         | Mouse  | Validated        |
| Smad1                | SMAD1            | Epitomics           | 1649-1      | 922.2          | Rabbit | Validated        |
| Smad3                | SMAD3            | Epitomics           | 1735-1      | 796.1          | Rabbit | Validated        |
| Smad4                | SMAD4            | Santa Cruz          | sc-7966     | 920.1          | Mouse  | Validated        |
| Src                  | SRC              | Upstate (Millipore) | 05-184      | 621.2          | Mouse  | Validated        |

|                  |         |                |            |        |        |                  |
|------------------|---------|----------------|------------|--------|--------|------------------|
| Src_pY416        | SRC     | CST            | 2101       | 623.18 | Rabbit | Use with caution |
| Src_pY527        | SRC     | CST            | 2105       | 626.5  | Rabbit | Validated        |
| STAT3_pY705      | STAT3   | CST            | 9131       | 637.6  | Rabbit | Validated        |
| STAT5-alpha      | STAT5A  | Epitomics      | 1289-1     | 638.1  | Rabbit | Validated        |
| Stathmin         | STMN1   | Epitomics      | 1972-1     | 718.1  | Rabbit | Validated        |
| Syk              | SYK     | Santa Cruz     | sc-1240    | 1033.1 | Mouse  | Validated        |
| TAZ              | WWTR1   | CST            | 2149       | 777.1  | Rabbit | Validated        |
| TIGAR            | C12ORF5 | Epitomics      | S1711      | 1107.1 | Rabbit | Validated        |
| Transglutaminase | TGM2    | Lab Vision     | MS-224-P1  | 908.2  | Mouse  | Validated        |
| TRFC             | TRFC    | SDI / Novus    | 22500002   | 1140.1 | Rabbit | Validated        |
| TSC1             | TSC1    | CST            | 4906       | 1125.1 | Rabbit | Use with Caution |
| TTF1             | TTF1    | Epitomics      | 2044-1     | 1081.1 | Rabbit | Validated        |
| Tuberin          | TSC2    | Epitomics      | 1613-1     | 670.30 | Rabbit | Validated        |
| Tuberin_pT1462   | TSC2    | CST            | 3617       | 671.2  | Rabbit | Validated        |
| VEGFR2           | KDR     | CST            | 2479       | 688.4  | Rabbit | Validated        |
| VHL              | VHL     | BD Biosciences | 556347     | 693.1  | Mouse  | Use with Caution |
| XRCC1            | XRCC1   | CST            | 2735       | 906.1  | Rabbit | Under evaluation |
| YAP              | YAP1    | Santa Cruz     | sc-15407   | 780.3  | Rabbit | Under evaluation |
| YAP_pS127        | YAP1    | CST            | 4911       | 782.1  | Rabbit | Under evaluation |
| YB-1             | YBX1    | SDI            | 1725.00.02 | 700.1  | Rabbit | Validated        |
| YB-1_pS102       | YBX1    | CST            | 2900       | 835.1  | Rabbit | Validated        |
|                  |         |                |            |        |        |                  |

**Validation Status\***

VALID=RPPA and WB correlation > 0.7

Use with Caution=RPPA and WB correlation < 0.7

Under Evaluation=Antibody has given mixed results and / or evaluated by another lab; we are in the process of (re)validating.
